# Supplementary material for: Non-aromatic azolo[5,1-c][1,2,4]triazines: a pot, atom and step economic (PASE) synthesis, mechanistic insight and fluorescence properties
Source: Royal Society of Chemistry journal article supplement (doi:10.1039/d2nj04085a), 2022-01-01
Supplement: d2nj04085a1.pdf [file d2nj04085a1.pdf]

## Electronic supporting information

# Non-aromatic Azolo[5,1-c][1,2,4]triazines: A Pot, Atom and Step Economic (PASE) Synthesis, Mechanistic Insight and Fluorescent Properties

Elena V. Sadchikova,\* Nikolai A. Beliaev, Daria L. Alexeeva, Nikita E. Safronov, Nataliya P. Belskaya\*

*Department of Technology for Organic Chemistry, Ural Federal University, Ekaterinburg, 620002, Russia*

*Corresponding Authors*

Dr. Sadchikova Elena, E-mail: [e.v.sadchikova@urfu.ru](mailto:e.v.sadchikova@urfu.ru)

Prof. Belskaya Nataliya, E-mail: [n.p.belskaya@urfu.ru](mailto:n.p.belskaya@urfu.ru)

## Table of contents

|                                                                                                                                             |     |
|---------------------------------------------------------------------------------------------------------------------------------------------|-----|
| 1. Investigation of the reaction mechanism of pyrazole-5-diazonium salt or 5-diazopyrazole with thiadiazol-5-yl enamine by NMR spectroscopy | S2  |
| 2. Photophysical study                                                                                                                      | S3  |
| 3. X-ray structural analysis of compound <b>7g</b>                                                                                          | S4  |
| 4. NMR spectra of compounds <b>6a–i</b> , <b>7b–g</b> , <b>9</b>                                                                            | S8  |
| 5. References                                                                                                                               | S23 |

# 1. Investigation of the reaction mechanism of pyrazole-5-diazonium salt or 5-diazopyrazole with thiadiazol-5-yl enamine by NMR spectroscopy

The NMR tubes (5 mm) were used for monitoring the reactions (**1a** + **3b** → **4a**, Scheme S1; **5a** + **3a** → **6a**, Scheme S2). The amounts of each substance were determined by integration of the corresponding proton signals. Solutions of pyrazole-5-diazonium salt **1a** (0.05 mmol) with enamine **3b** (0.05 mmol) and 5-diazopyrazole **5a** (0.05 mmol) with enamines **3a** (0.05 mmol) in DMSO-*d*<sub>6</sub> were prepared and added to NMR tubes. The <sup>1</sup>H NMR spectra were detected immediately after mixing. The time of each experiment depended on the reaction rate. The spectra obtained were analyzed in comparison with the spectra of pure compounds.

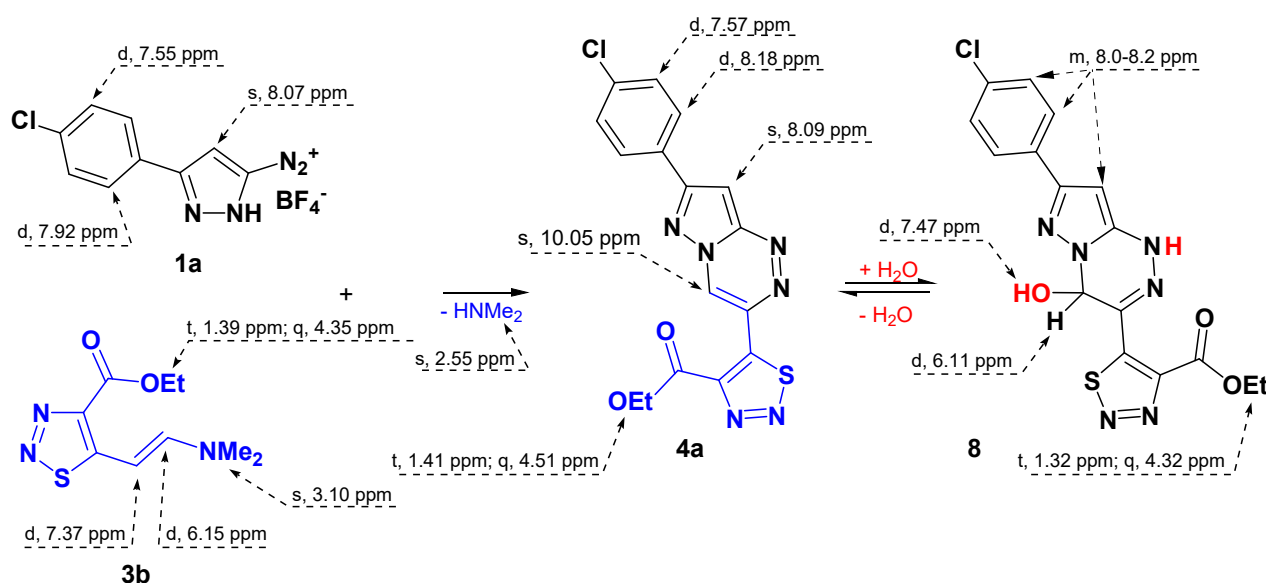

**Scheme S1.** Monitoring the reaction of pyrazole-5-diazonium salt **1a** with thiadiazol-5-yl enamine **3b** by <sup>1</sup>H NMR spectroscopy (in DMSO-*d*<sub>6</sub>)

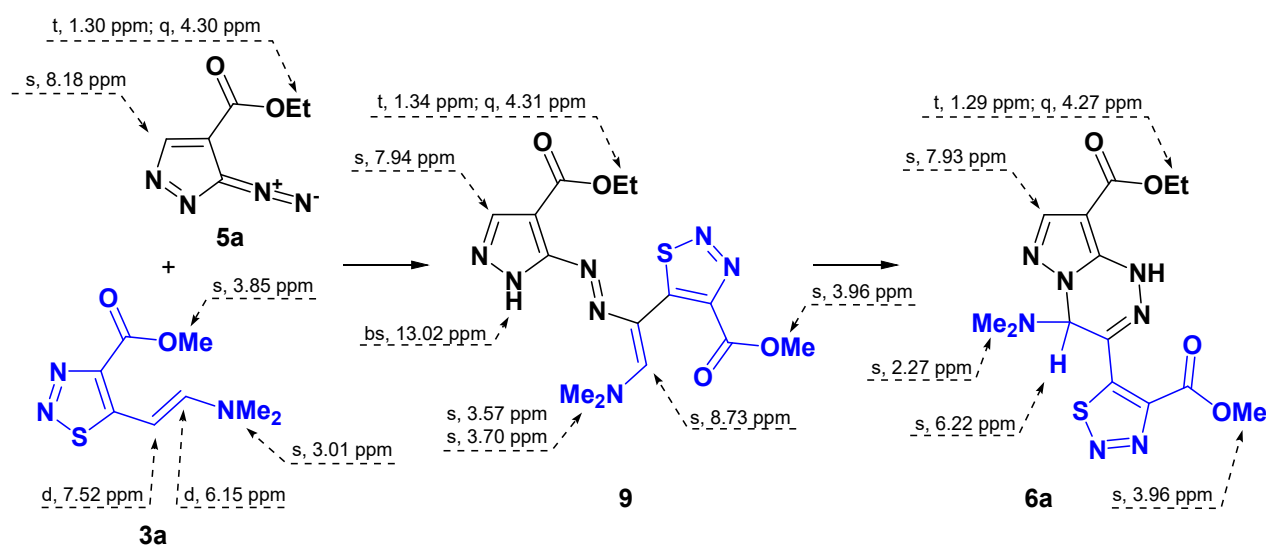

**Scheme S2.** Monitoring the reaction of 5-diazopyrazole **5a** with thiadiazol-5-yl enamine **3a** by <sup>1</sup>H NMR spectroscopy (in DMSO-*d*<sub>6</sub>)

## 2. Photophysical study

UV-Vis absorption spectra were recorded on a Shimadzu UV-1800 spectrophotometer (Kyoto, Japan). The fluorescence of the sample solutions was measured using a Hitachi F-7000 spectrophotometer (Tokyo, Japan). The absorption and emission spectra were recorded in toluene, dioxane, CH<sub>2</sub>Cl<sub>2</sub>, CHCl<sub>3</sub>, THF, EtOH, EtOAc, acetone, MeCN, DMF and DMSO using 10.00 mm quartz cells. The excitation wavelength was at the absorption maxima. The atmospheric oxygen contained in the solutions was not removed. The concentration of the compounds in the solution was  $5.0 \times 10^{-5}$  M and  $5.0 \times 10^{-6}$  M for the absorption and fluorescence measurements, respectively. The relative fluorescence quantum yields ( $\Phi_F$ ) were determined using quinine sulfate ( $5 \times 10^{-5}$  M) in 0.1 M H<sub>2</sub>SO<sub>4</sub> as a standard ( $\Phi_F = 0.546$ ).

The absolute quantum yield for the solid-state and time-resolution study was recorded on Horiba FluoroMax 4 Spectrofluorometer (Kyoto, Japan) with a Quanta- $\phi$  integrating sphere using FluorEssence 3.5 Software.

### Lippert-Mataga plot:<sup>1, 2</sup>

$$\tilde{\nu}_a - \tilde{\nu}_f = m_{L-M} f(\varepsilon, n) + constant \quad (\text{Eq. S1})$$

$m_{L-M}$  – the slope of the linear plot of the Stokes shift versus the orientation polarizability

$f(\varepsilon, n)$  – orientation polarizability of the solvents

$\tilde{\nu}_a - \tilde{\nu}_f$  – Stokes shift

$$f(\varepsilon, n) = \left( \frac{\varepsilon - 1}{2\varepsilon + 1} - \frac{n^2 - 1}{2n^2 + 1} \right) \quad (\text{Eq. S2})$$

$\varepsilon$  dielectric constant

$n$  refractive index

### Reichardt plot:<sup>14-16</sup>

$$\tilde{\nu}_a - \tilde{\nu}_f = m_{E_T^N} E_T^N + constant \quad (\text{Eq. S3})$$

$E_T^N$  – the normalized solvent polarity of Reichardt

$m_{E_T^N}$  – the slope of the linear plot of the Stokes shift versus the microscopic solvent polarity

$$E_T^N = \frac{E_T(30)_{\text{solvent}} - E_T(30)_{\text{TMS}}}{E_T(30)_{\text{water}} - E_T(30)_{\text{TMS}}} = \frac{E_T(30)_{\text{solvent}} - 30.7}{32.4} \quad (\text{Eq. S4})$$

$E_T(30)_i$  – the empirical solvent polarity parameter

TMS represent tetramethylsilane (non-polar solvent)

### Dimrot-Reichert plot:<sup>3-5</sup>

$$\tilde{\nu}_a - \tilde{\nu}_f = m_{E_T(30)} E_T(30) + constant \quad (\text{Eq. S5})$$

$$E_T(30)_i = hcN\tilde{\nu}_{ai} = 2.8591 \times 10^{-3} \tilde{\nu}_{ai} \quad (\text{in } kcal \text{ mol}^{-1}) \quad (\text{Eq. S6})$$

$m_{E_{T(30)}}$ – the slope of the linear plot of the Stokes shift versus the empirical solvent polarity parameter

### 3. X-ray structural analysis of compound 7g

Single crystals of  $C_{13}H_{15}N_7O_4S$  **7g** were grown from EtOH. The experiments were accomplished on the automated X-ray diffractometer «Xcalibur 3» with CCD detector on standard procedure (MoK $\alpha$ -irradiation, graphite monochromator,  $\omega$ -scans with 1° step at T= 295(2) K). Empirical absorption correction was applied. The crystal was kept at 295(2) K during data collection. Using Olex2<sup>6</sup>, the structure was solved with the ShelXS<sup>7</sup> structure solution program using Direct Methods and refined with the ShelXL<sup>7</sup> refinement package using Least Squares minimisation.

**Crystal Data.**  $C_{13}H_{15}N_7O_4S$ ,  $M=365.38$ , monoclinic,  $a = 18.226(3)$  Å,  $b = 12.3104(11)$  Å,  $c = 7.2437(11)$  Å,  $\beta = 98.275(16)^\circ$ ,  $V = 1608.3(4)$  Å<sup>3</sup>,  $T = 295(2)$ , space group  $P2_1/c$  (no. 14),  $Z = 4$ ,  $\mu(\text{Mo K}\alpha) = 0.238$ , 5855 reflections measured, 3198 unique ( $R_{\text{int}} = 0.0340$ ) which were used in all calculations. The final  $wR_2$  was 0.1483 (all data) and  $R_1$  was 0.0531 ( $>2\sigma(I)$ ).

CCDC 2177562 for **7g** can be obtained free of charge from the Cambridge Crystallographic Data Centre via link [www.ccdc.cam.ac.uk/data\\_request/cif](http://www.ccdc.cam.ac.uk/data_request/cif).

**Table S1.** Crystal Data and Details of the Structure Determination for compound **7g**

| Crystal Data                                   |                                                                |
|------------------------------------------------|----------------------------------------------------------------|
| Formula                                        | $C_{13}H_{15}N_7O_4S$                                          |
| Formula Weight                                 | 365.38                                                         |
| Crystal System                                 | Monoclinic                                                     |
| Space group                                    | $P2_1/c$ (№ 14)                                                |
| $a/\text{Å}$                                   | 18.226(3)                                                      |
| $b/\text{Å}$                                   | 12.3104(11)                                                    |
| $c/\text{Å}$                                   | 7.2437(11)                                                     |
| $\alpha/^\circ$                                | 90.00                                                          |
| $\beta/^\circ$                                 | 98.275(16)                                                     |
| $\gamma/^\circ$                                | 90.00                                                          |
| Volume/Å <sup>3</sup>                          | 1608.3(4)                                                      |
| Z                                              | 4                                                              |
| $\rho_{\text{calc}}$ , g/cm <sup>3</sup>       | 1.509                                                          |
| $\mu/\text{mm}^{-1}$                           | 0.238                                                          |
| F(000)                                         | 760.0                                                          |
| Crystal size, mm                               | 0.25 × 0.11 × 0.01                                             |
| Data Collection and refinement                 |                                                                |
| Temperature, K                                 | 295(2)                                                         |
| Radiation, Å                                   | Mo K $\alpha$ ( $\lambda = 0.71073$ )                          |
| 2 $\theta$ range for data collection/ $^\circ$ | 4.52 to 52.72                                                  |
| Index ranges                                   | $-7 \leq h \leq 22$ , $-8 \leq k \leq 15$ , $-9 \leq l \leq 8$ |
| Reflections collected                          | 5855                                                           |
| Independent reflections                        | 3198 [ $R_{\text{int}} = 0.0340$ ]                             |
| Data / restraints / parameters                 | 3198 / 26 / 260                                                |
| Goodness-of-fit on $F^2$                       | 1.006                                                          |
| Final R indexes [ $I \geq 2\sigma(I)$ ]        | $R_1 = 0.0531$ , $wR_2 = 0.1198$                               |
| Final R indexes [all data]                     | $R_1 = 0.1045$ , $wR_2 = 0.1483$                               |
| Largest diff. peak / hole, e/Å <sup>3</sup>    | 0.22 / -0.22                                                   |

**Table S2.** Fractional Atomic Coordinates ( $\times 10^4$ ) and Equivalent Isotropic Displacement Parameters ( $\text{\AA}^2 \times 10^3$ ) for **7g**.  $U_{\text{eq}}$  is defined as 1/3 of the trace of the orthogonalised  $U_{\text{IJ}}$  tensor

| Atom | <i>x</i>    | <i>y</i>    | <i>z</i>  | $U(\text{eq})$ |
|------|-------------|-------------|-----------|----------------|
| N7   | 1387.7(13)  | 1878.1(17)  | -942(3)   | 38.6(6)        |
| N1   | 1056.0(13)  | -284.9(16)  | -1201(3)  | 39.6(6)        |
| O3   | 2275.8(12)  | -248.2(15)  | -2031(3)  | 48.9(6)        |
| N6   | 737.2(15)   | 1530.8(19)  | -1868(4)  | 41.7(7)        |
| N12  | 3790.4(15)  | 2029(2)     | 2004(4)   | 59.1(8)        |
| N3   | 25.4(14)    | -1205.2(18) | -2163(4)  | 44.9(7)        |
| O1   | 3137.4(14)  | -615(2)     | 2084(4)   | 73.7(8)        |
| C4   | -98.6(16)   | -107(2)     | -2544(4)  | 38.7(7)        |
| N13  | 3544.1(16)  | 3009(2)     | 1792(4)   | 63.1(8)        |
| C9   | 1832.7(17)  | -28(2)      | -608(5)   | 39.0(7)        |
| C5   | 538.4(16)   | 458(2)      | -1933(4)  | 36.1(7)        |
| O4   | -878.3(14)  | 1320.6(16)  | -3664(4)  | 71.2(8)        |
| C8   | 1891.8(16)  | 1173(2)     | -285(4)   | 37.7(7)        |
| N15  | -1349.8(17) | -369(2)     | -3949(5)  | 57.8(9)        |
| C11  | 3273.7(18)  | 1248(2)     | 1374(5)   | 46.2(8)        |
| C2   | 712.8(18)   | -1276(2)    | -1373(4)  | 46.2(8)        |
| O2   | 4232.1(15)  | 6(2)        | 1509(5)   | 93.6(10)       |
| C21  | -797.6(18)  | 338(2)      | -3429(4)  | 45.9(8)        |
| C10  | 2588.8(17)  | 1658(2)     | 610(4)    | 39.8(7)        |
| C14  | 3525(2)     | 110(3)      | 1689(5)   | 58.7(10)       |
| C22  | 2448(2)     | -1378(3)    | -2263(6)  | 67.5(11)       |
| C23  | 3093(3)     | -1420(4)    | -3305(7)  | 107.9(18)      |
| C17  | 4599(15)    | -1050(20)   | 1740(20)  | 86(3)          |
| S1   | 2657.9(5)   | 3029.1(6)   | 769.2(13) | 53.5(3)        |
| C20  | 4604(8)     | -1639(13)   | 770(20)   | 161(6)         |
| C19  | 4840(20)    | -910(20)    | 3910(30)  | 108(7)         |
| C18  | 4596(15)    | -1010(20)   | 2360(20)  | 86(3)          |
| C12  | 4720(20)    | -1410(20)   | 3790(30)  | 108(7)         |

**Table S3.** Anisotropic Displacement Parameters ( $\text{\AA}^2 \times 10^3$ ) for **7g**. The anisotropic displacement factor exponent takes the form:  $-2\pi^2[h^2a^*U_{11} + \dots + 2hka^*b^*U_{12}]$

| Atom | $U_{11}$ | $U_{22}$ | $U_{33}$ | $U_{23}$ | $U_{13}$  | $U_{12}$ |
|------|----------|----------|----------|----------|-----------|----------|
| N7   | 29.7(14) | 31.7(12) | 52.6(16) | -1.3(11) | -0.5(11)  | -0.2(11) |
| N1   | 34.2(15) | 26.0(11) | 56.8(17) | 2.2(10)  | 0.3(12)   | -1.3(11) |
| O3   | 46.3(14) | 34.9(11) | 66.0(15) | -2(1)    | 10.2(11)  | 7.4(10)  |
| N6   | 32.8(15) | 25.7(12) | 62.9(18) | 0.2(12)  | -5.7(13)  | 0.2(12)  |
| N12  | 38.6(17) | 51.4(16) | 82(2)    | -4.1(15) | -7.5(14)  | -1.1(14) |
| N3   | 39.3(16) | 30.3(12) | 63.2(18) | 0.8(11)  | 0.6(13)   | -5.1(11) |
| O1   | 50.4(16) | 58.2(15) | 106(2)   | 27.5(14) | -9.0(14)  | -2.1(13) |
| C4   | 36.1(18) | 29.3(13) | 49.3(18) | -0.7(12) | 1.3(14)   | -2.5(13) |
| N13  | 42.3(18) | 50.4(16) | 91(2)    | -9.6(15) | -10.5(16) | -5.5(14) |
| C9   | 33.2(18) | 32.2(14) | 50.1(19) | 3.6(14)  | 1.2(15)   | 0.4(13)  |
| C5   | 33.5(17) | 28.9(14) | 44.9(18) | 1.3(12)  | 1.9(13)   | 0.4(13)  |
| O4   | 57.9(17) | 31.7(12) | 114(2)   | 6.9(12)  | -20.2(15) | -3.2(11) |
| C8   | 32.5(17) | 31.8(14) | 48.4(18) | -1.0(13) | 4.0(14)   | -1.1(13) |
| N15  | 41.3(19) | 34.3(16) | 90(2)    | 3.8(15)  | -17.4(17) | -4.6(14) |
| C11  | 36.3(19) | 40.9(16) | 59(2)    | -2.7(14) | 0.5(15)   | -1.3(14) |
| C2   | 45(2)    | 27.2(14) | 64(2)    | 1.4(13)  | -2.1(16)  | -3.5(14) |
| O2   | 46.1(18) | 59.2(16) | 176(3)   | 22.1(17) | 18.6(18)  | 18.4(14) |
| C21  | 44(2)    | 34.0(15) | 58(2)    | 0.8(14)  | 1.0(15)   | -4.1(15) |
| C10  | 34.7(18) | 37.7(15) | 46.2(18) | -3.2(13) | 2.8(14)   | 1.7(13)  |
| C14  | 43(2)    | 50(2)    | 79(3)    | 5.0(18)  | -6.3(19)  | 3.1(18)  |
| C22  | 74(3)    | 39.7(18) | 87(3)    | -8.7(17) | 5(2)      | 19.8(18) |
| C23  | 111(4)   | 89(3)    | 129(4)   | -27(3)   | 39(4)     | 37(3)    |
| C17  | 75(3)    | 74(3)    | 108(8)   | 4(6)     | 8(6)      | 21(3)    |
| S1   | 42.3(5)  | 36.7(4)  | 77.3(6)  | -9.7(4)  | -5.7(4)   | -0.1(4)  |
| C20  | 114(12)  | 148(13)  | 213(19)  | 32(11)   | -8(12)    | 20(10)   |
| C19  | 96(10)   | 115(15)  | 114(9)   | 48(9)    | 19(7)     | 21(12)   |
| C18  | 75(3)    | 74(3)    | 108(8)   | 4(6)     | 8(6)      | 21(3)    |
| C12  | 96(10)   | 115(15)  | 114(9)   | 48(9)    | 19(7)     | 21(12)   |

**Table S4.** Bond Lengths for **7g**

| Atom–Atom | Length/ $\text{\AA}$ | Atom–Atom | Length/ $\text{\AA}$ | Atom–Atom | Length/ $\text{\AA}$ |
|-----------|----------------------|-----------|----------------------|-----------|----------------------|
| N7–N6     | 1.345(3)             | N3–C4     | 1.391(3)             | C11–C10   | 1.385(4)             |
| N7–C8     | 1.303(3)             | N3–C2     | 1.303(4)             | C11–C14   | 1.481(4)             |
| N1–C9     | 1.454(4)             | O1–C14    | 1.198(4)             | O2–C14    | 1.321(4)             |
| N1–C5     | 1.365(3)             | C4–C5     | 1.372(4)             | O2–C17    | 1.46(2)              |
| N1–C2     | 1.369(3)             | C4–C21    | 1.449(4)             | O2–C18    | 1.51(2)              |
| O3–C9     | 1.423(4)             | N13–S1    | 1.678(3)             | C10–S1    | 1.695(3)             |
| O3–C22    | 1.441(3)             | C9–C8     | 1.499(4)             | C22–C23   | 1.485(6)             |
| N6–C5     | 1.368(3)             | O4–C21    | 1.228(3)             | C17–C12   | 1.539(18)            |
| N12–N13   | 1.289(3)             | C8–C10    | 1.467(4)             | C20–C18   | 1.38(2)              |
| N12–C11   | 1.377(4)             | N15–C21   | 1.342(4)             |           |                      |

**Table S5.** Bond Angles for **7g**

| Atom–Atom–<br>Atom | Angle/°  | Atom–Atom–<br>Atom | Angle/°   | Atom–Atom–<br>Atom | Angle/°   |
|--------------------|----------|--------------------|-----------|--------------------|-----------|
| C8–N7–N6           | 119.7(2) | O3–C9–C8           | 105.4(2)  | O4–C21–C4          | 120.9(3)  |
| C5–N1–C9           | 123.9(2) | N1–C5–N6           | 118.0(3)  | O4–C21–N15         | 122.0(3)  |
| C5–N1–C2           | 106.3(2) | N1–C5–C4           | 106.9(2)  | N15–C21–C4         | 117.1(3)  |
| C2–N1–C9           | 129.3(2) | N6–C5–C4           | 135.1(3)  | C8–C10–S1          | 119.1(2)  |
| C9–O3–C22          | 115.1(2) | N7–C8–C9           | 124.7(3)  | C11–C10–C8         | 134.6(3)  |
| N7–N6–C5           | 122.3(2) | N7–C8–C10          | 114.3(2)  | C11–C10–S1         | 106.3(2)  |
| N13–N12–C11        | 113.8(3) | C10–C8–C9          | 120.5(2)  | O1–C14–C11         | 124.2(3)  |
| C2–N3–C4           | 105.7(2) | N12–C11–C10        | 114.4(3)  | O1–C14–O2          | 124.6(3)  |
| N3–C4–C21          | 124.2(2) | N12–C11–C14        | 115.3(3)  | O2–C14–C11         | 111.1(3)  |
| C5–C4–N3           | 108.9(2) | C10–C11–C14        | 130.3(3)  | O3–C22–C23         | 107.2(3)  |
| C5–C4–C21          | 126.9(2) | N3–C2–N1           | 112.2(2)  | O2–C17–C12         | 111.7(17) |
| N12–N13–S1         | 111.3(2) | C14–O2–C17         | 120.9(11) | N13–S1–C10         | 94.19(14) |
| N1–C9–C8           | 107.8(2) | C14–O2–C18         | 114.7(10) | C20–C18–O2         | 100.4(12) |
| O3–C9–N1           | 112.0(2) | C17–O2–C18         | 17.5(11)  |                    |           |

**Table S6.** Hydrogen Atom Coordinates ( $\text{\AA}\times 10^4$ ) and Isotropic Displacement Parameters ( $\text{\AA}^2\times 10^3$ ) for **7g**

| Atom | <i>x</i>  | <i>y</i> | <i>z</i>  | U(eq)  |
|------|-----------|----------|-----------|--------|
| H2   | 944       | -1926    | -972      | 55     |
| H22A | 2027      | -1751    | -2955     | 81     |
| H22B | 2571      | -1726    | -1057     | 81     |
| H23A | 2951      | -1136    | -4538     | 162    |
| H23B | 3253      | -2159    | -3385     | 162    |
| H23C | 3491      | -993     | -2665     | 162    |
| H17A | 5075      | -1002    | 1289      | 103    |
| H17B | 4301      | -1582    | 990       | 103    |
| H20A | 4858      | -1254    | -96       | 242    |
| H20B | 4104      | -1785    | 213       | 242    |
| H20C | 4855      | -2312    | 1106      | 242    |
| H19A | 5137      | -267     | 4160      | 162    |
| H19B | 4391      | -833     | 4447      | 162    |
| H19C | 5112      | -1527    | 4440      | 162    |
| H18A | 5094      | -873     | 2990      | 103    |
| H18B | 4305      | -1350    | 3225      | 103    |
| H9   | 1987(16)  | -440(20) | 460(40)   | 41(8)  |
| H12A | 4272      | -1735    | 4091      | 162    |
| H12B | 4847      | -795     | 4581      | 162    |
| H12C | 5114      | -1935    | 3978      | 162    |
| H6   | 470(20)   | 2020(30) | -2190(50) | 64(12) |
| H15A | -1281(18) | -990(30) | -3870(40) | 48(10) |
| H15B | -1730(20) | -160(30) | -4780(50) | 78(13) |



#### 4. NMR spectra of compounds 6a–i, 7b–d, 9

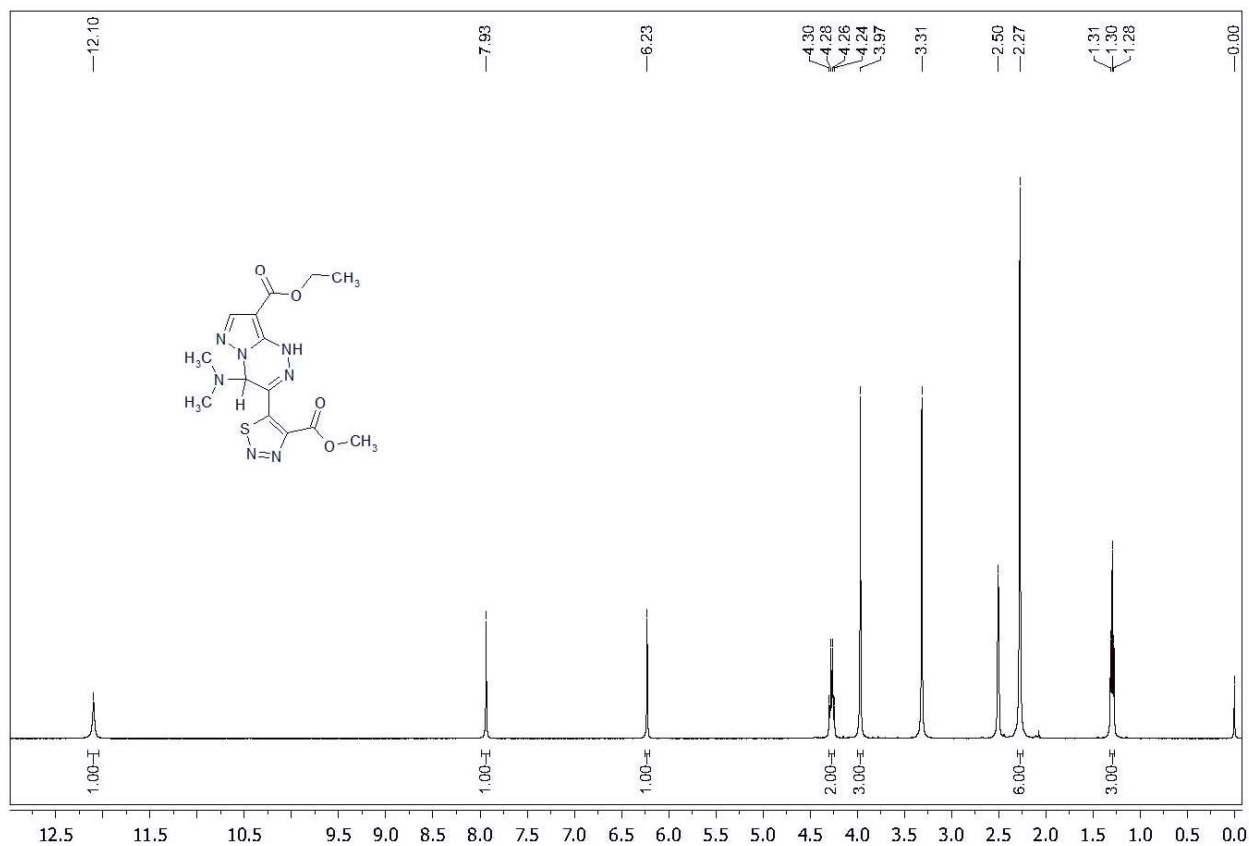

**Fig. S1.** <sup>1</sup>H NMR spectrum of ethyl 4-(*N,N*-dimethylamino)-3-[4-(methoxycarbonyl)-1,2,3-thiadiazol-5-yl]-1,4-dihydropyrazolo[5,1-*c*][1,2,4]triazine-8-carboxylate (**6a**)

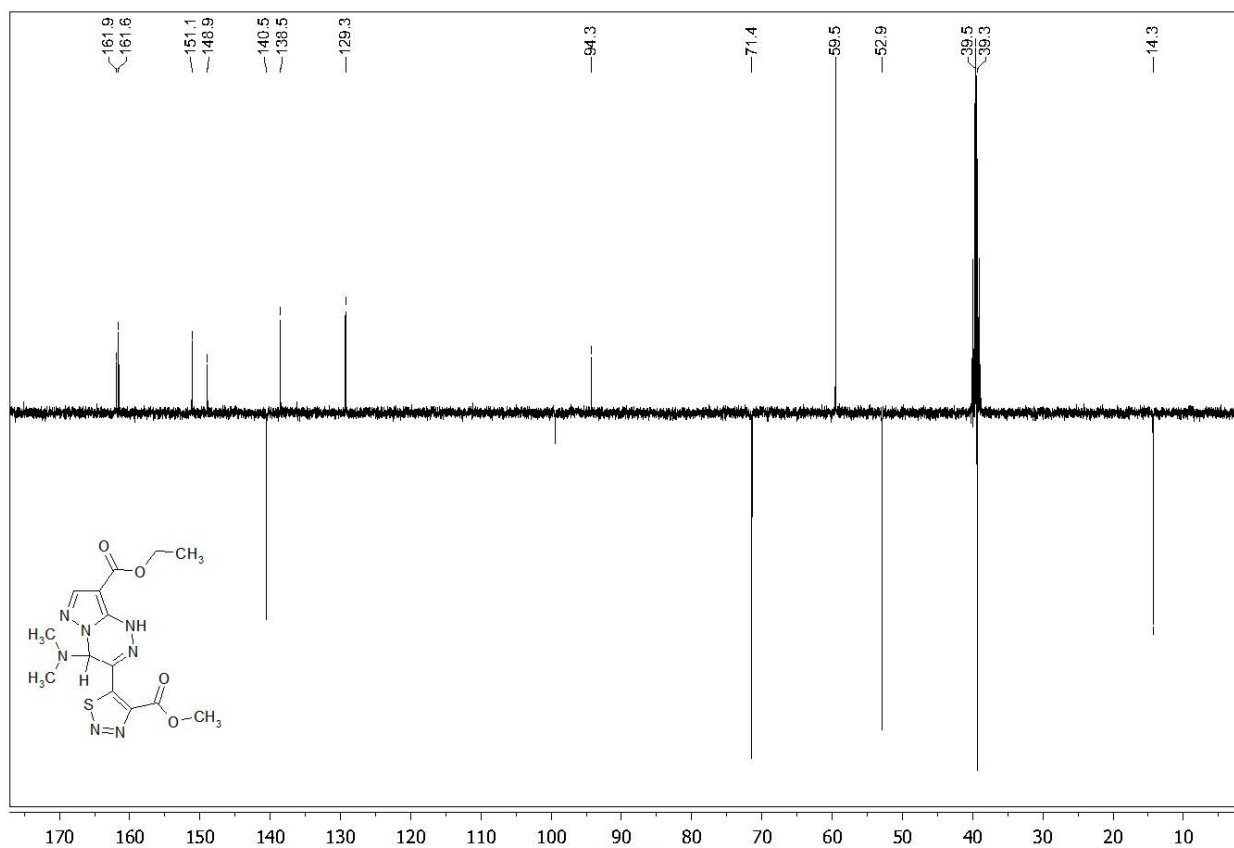

**Fig. S2.** <sup>13</sup>C(Apt) NMR spectrum of ethyl 4-(*N,N*-dimethylamino)-3-[4-(methoxycarbonyl)-1,2,3-thiadiazol-5-yl]-1,4-dihydropyrazolo[5,1-*c*][1,2,4]triazine-8-carboxylate (**6a**)

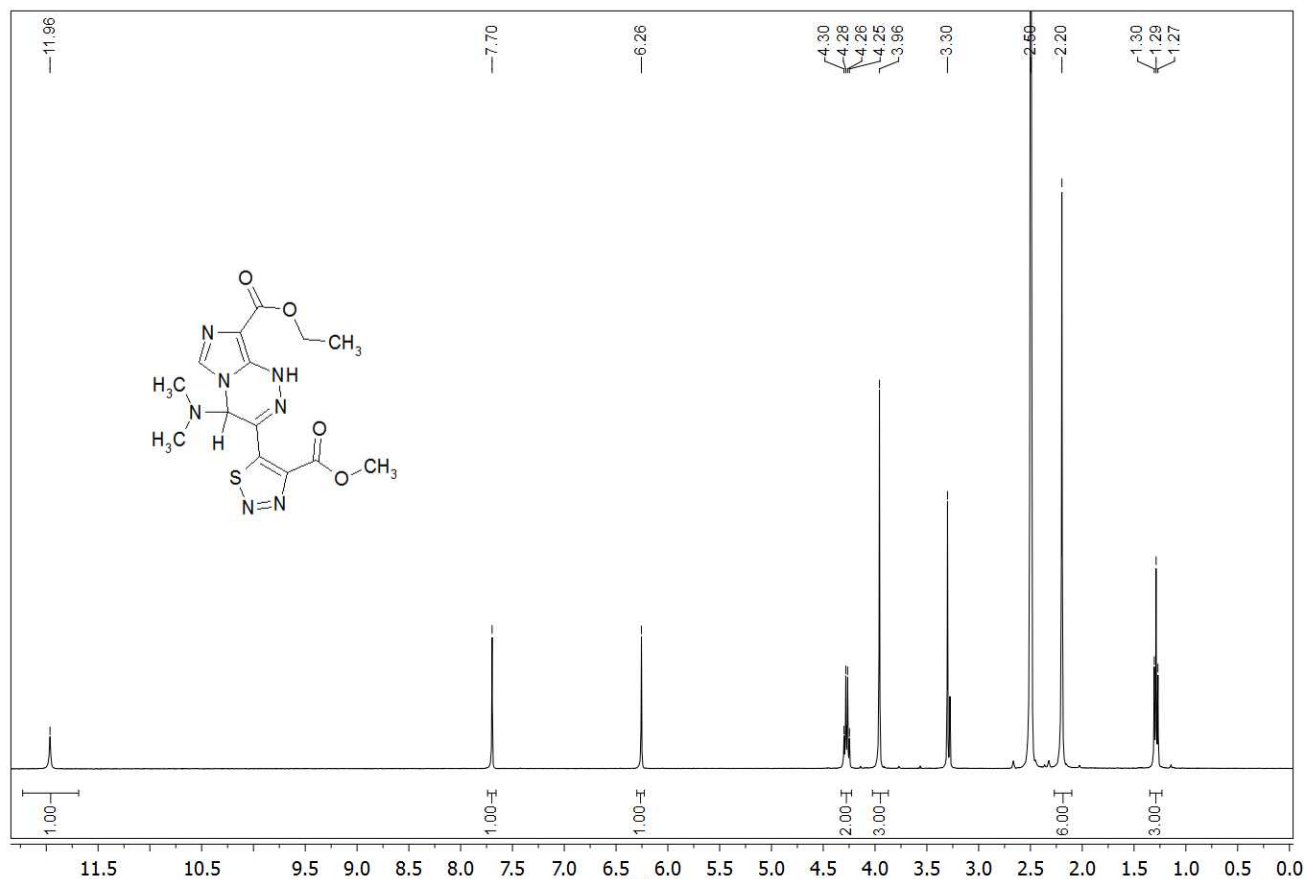

**Fig. S3.** <sup>1</sup>H NMR spectrum of ethyl 4-(*N,N*-dimethylamino)-3-[4-(methoxycarbonyl)-1,2,3-thiadiazol-5-yl]-1,4-dihydroimidazo[5,1-*c*][1,2,4]triazine-8-carboxylate (**6b**)

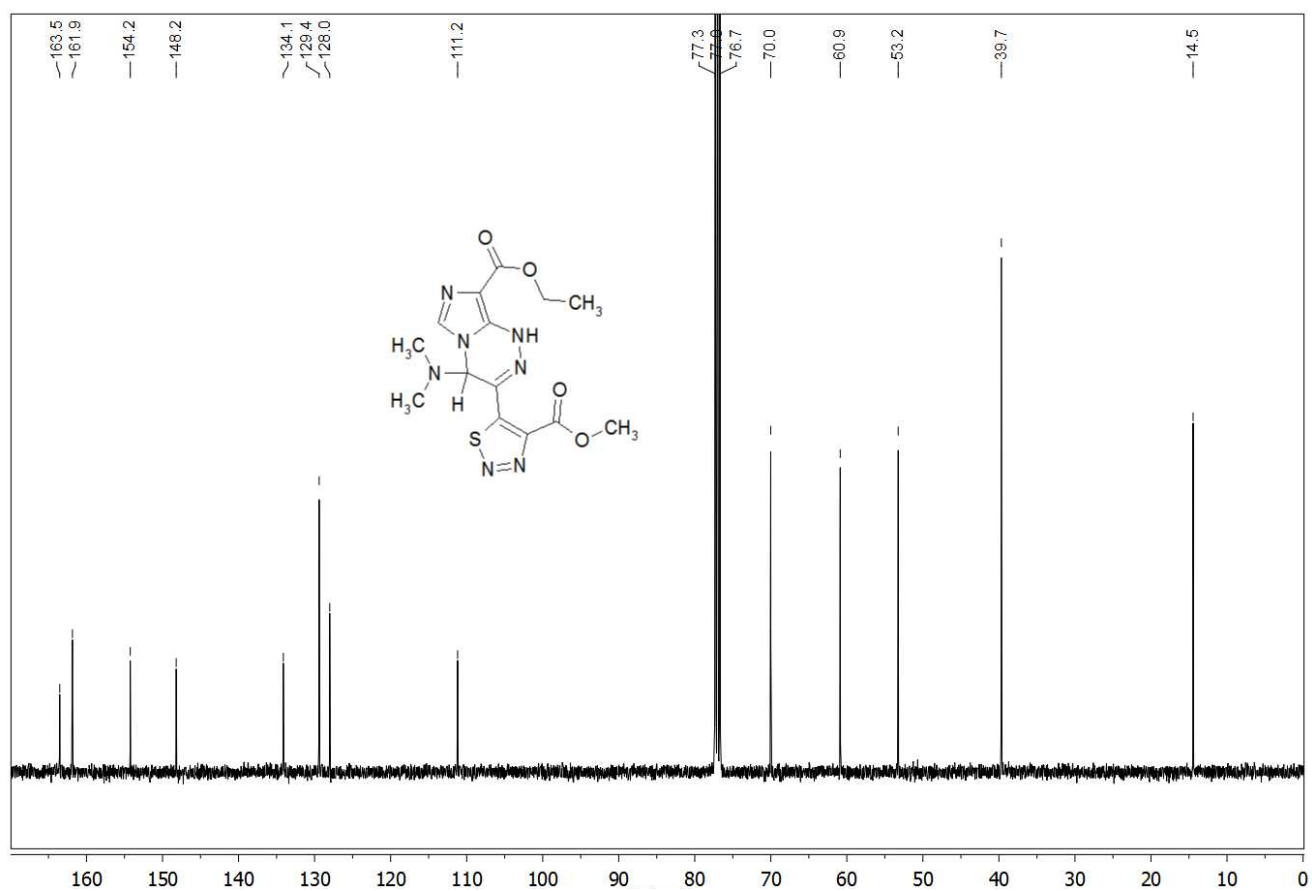

**Fig. S4.** <sup>13</sup>C NMR spectrum of ethyl 4-(*N,N*-dimethylamino)-3-[4-(methoxycarbonyl)-1,2,3-thiadiazol-5-yl]-1,4-dihydroimidazo[5,1-*c*][1,2,4]triazine-8-carboxylate (**6b**)

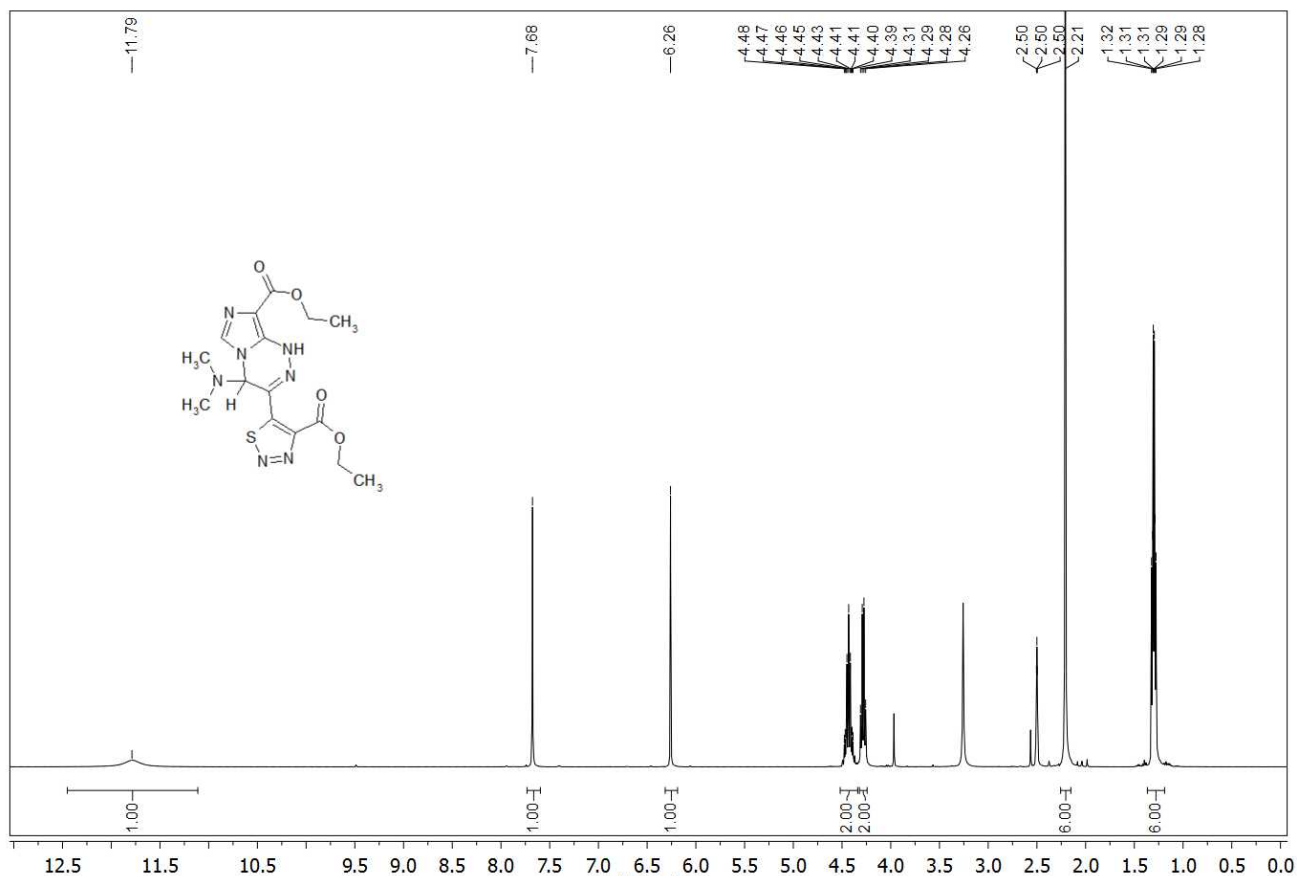

**Fig. S5.** <sup>1</sup>H NMR spectrum of ethyl 4-(*N,N*-dimethylamino)-3-[4-(ethoxycarbonyl)-1,2,3-thiadiazol-5-yl]-1,4-dihydroimidazo[5,1-*c*][1,2,4]triazine-8-carboxylate (**6c**)

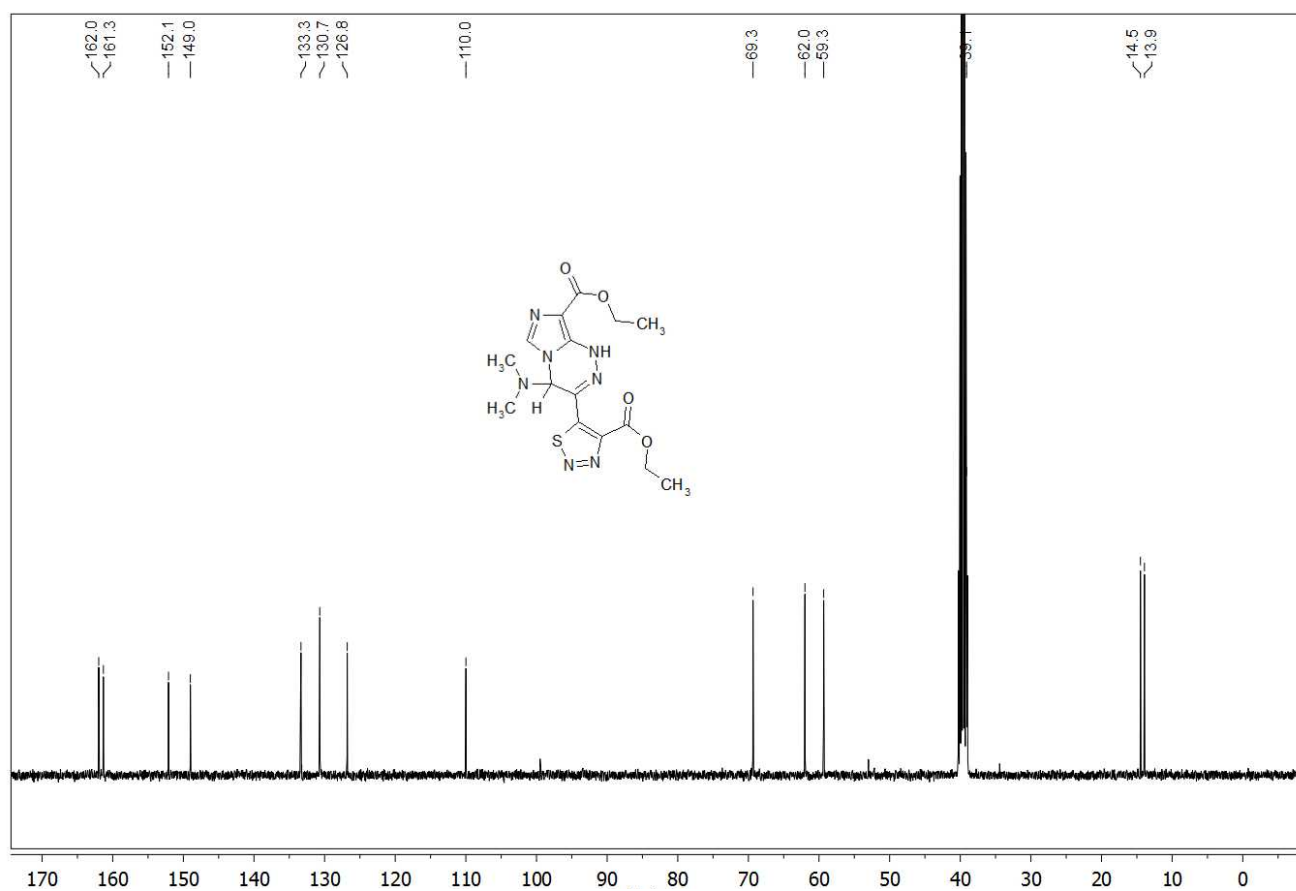

**Fig. S6.** <sup>13</sup>C NMR spectrum of ethyl 4-(*N,N*-dimethylamino)-3-[4-(ethoxycarbonyl)-1,2,3-thiadiazol-5-yl]-1,4-dihydroimidazo[5,1-*c*][1,2,4]triazine-8-carboxylate (**6c**)

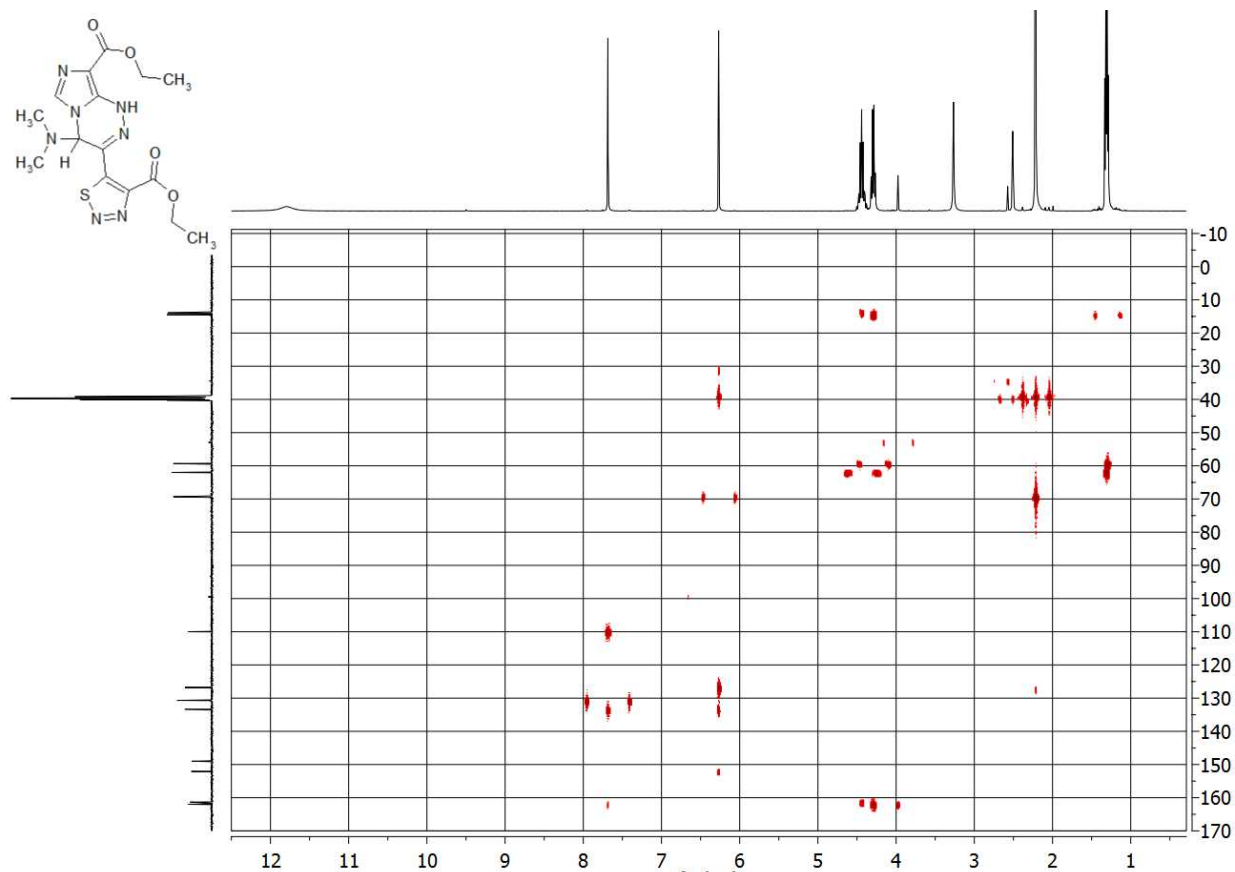

**Fig. S7.** HMBC spectrum of ethyl 4-(*N,N*-dimethylamino)-3-[4-(ethoxycarbonyl)-1,2,3-thiadiazol-5-yl]-1,4-dihydroimidazo[5,1-*c*][1,2,4]triazine-8-carboxylate (**6c**)

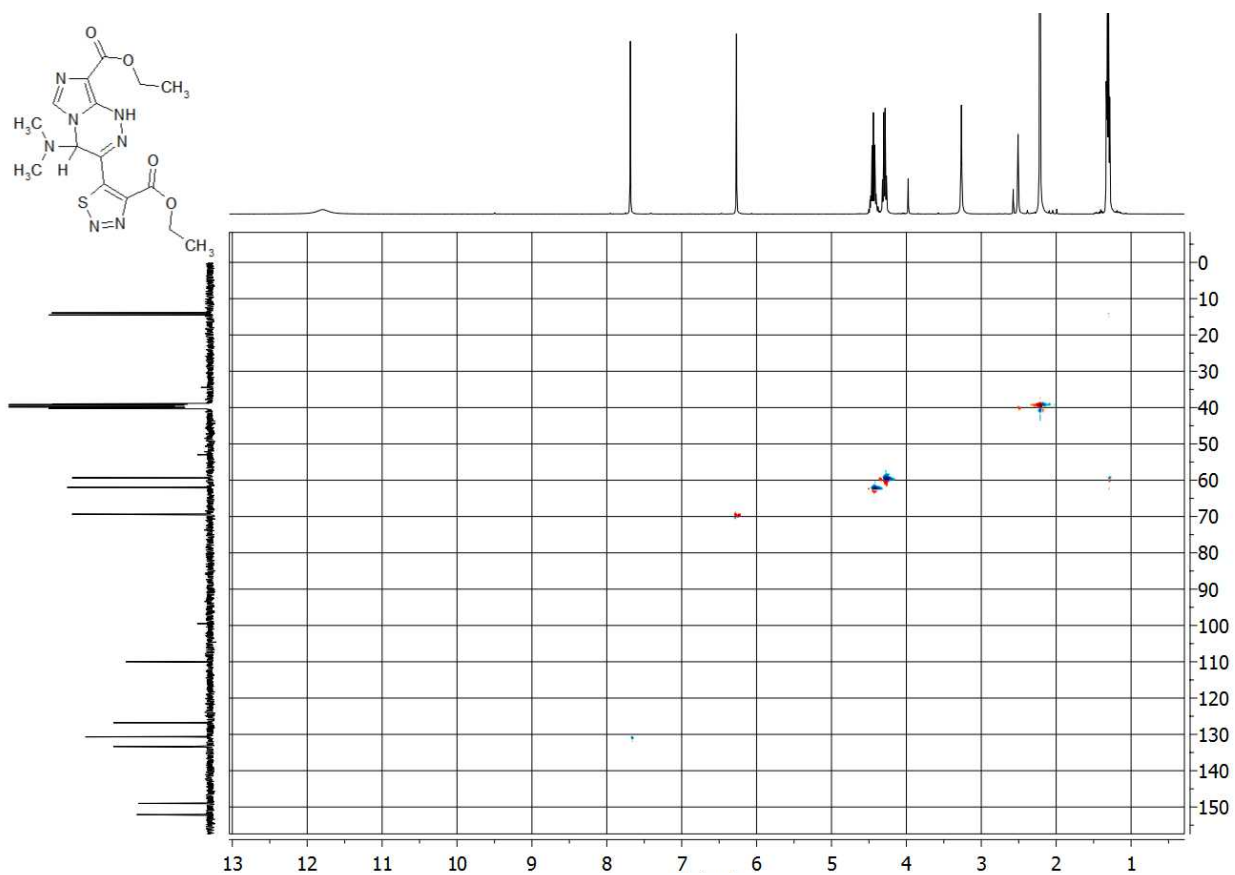

**Fig. S8.** HSQC spectrum of ethyl 4-(*N,N*-dimethylamino)-3-[4-(ethoxycarbonyl)-1,2,3-thiadiazol-5-yl]-1,4-dihydroimidazo[5,1-*c*][1,2,4]triazine-8-carboxylate (**6c**)

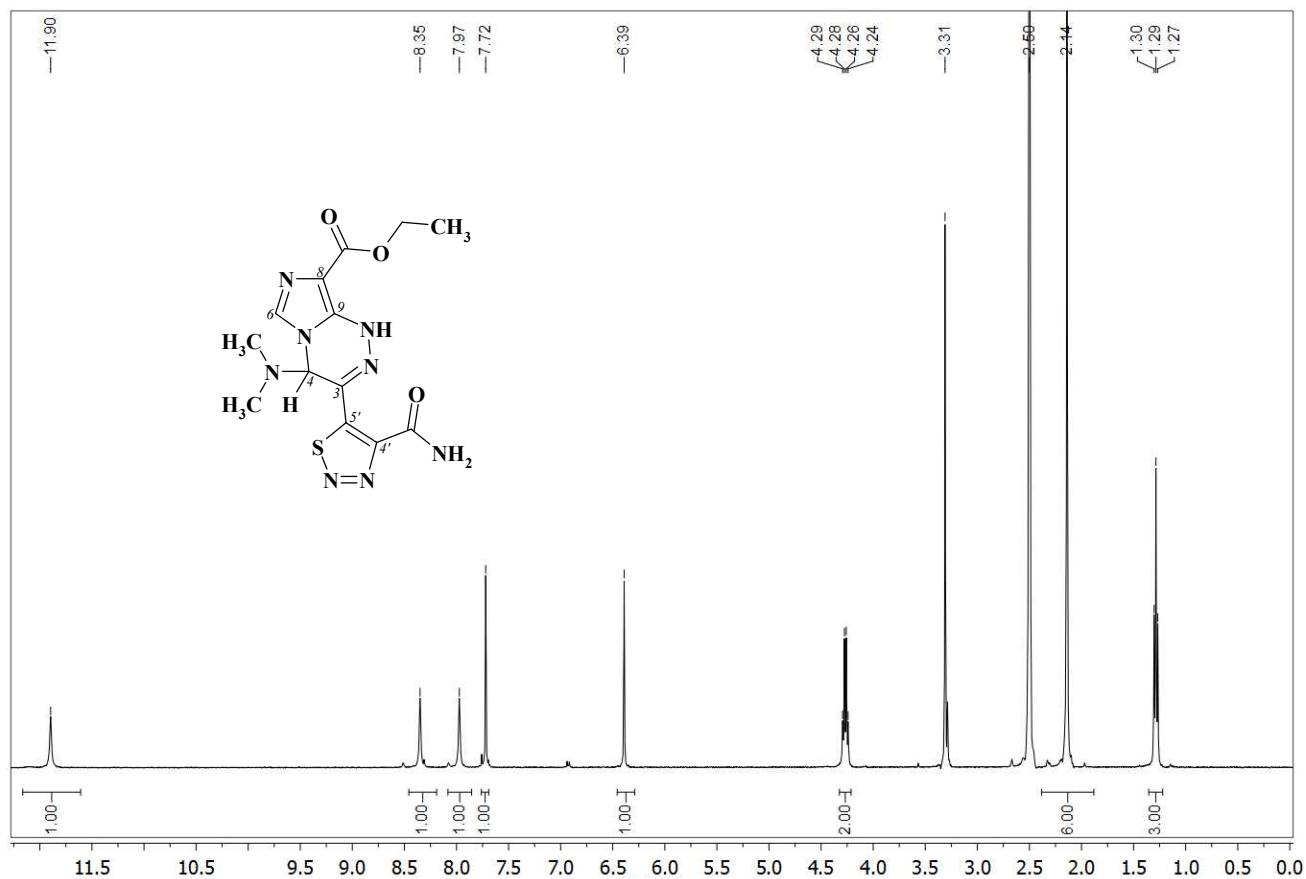

**Fig. S9.** <sup>1</sup>H NMR spectrum of ethyl 3-(4-carbamoyl-1,2,3-thiadiazol-5-yl)-4-(*N,N*-dimethylamino)-1,4-dihydroimidazo[5,1-*c*][1,2,4]triazine-8-carboxylate (**6d**)

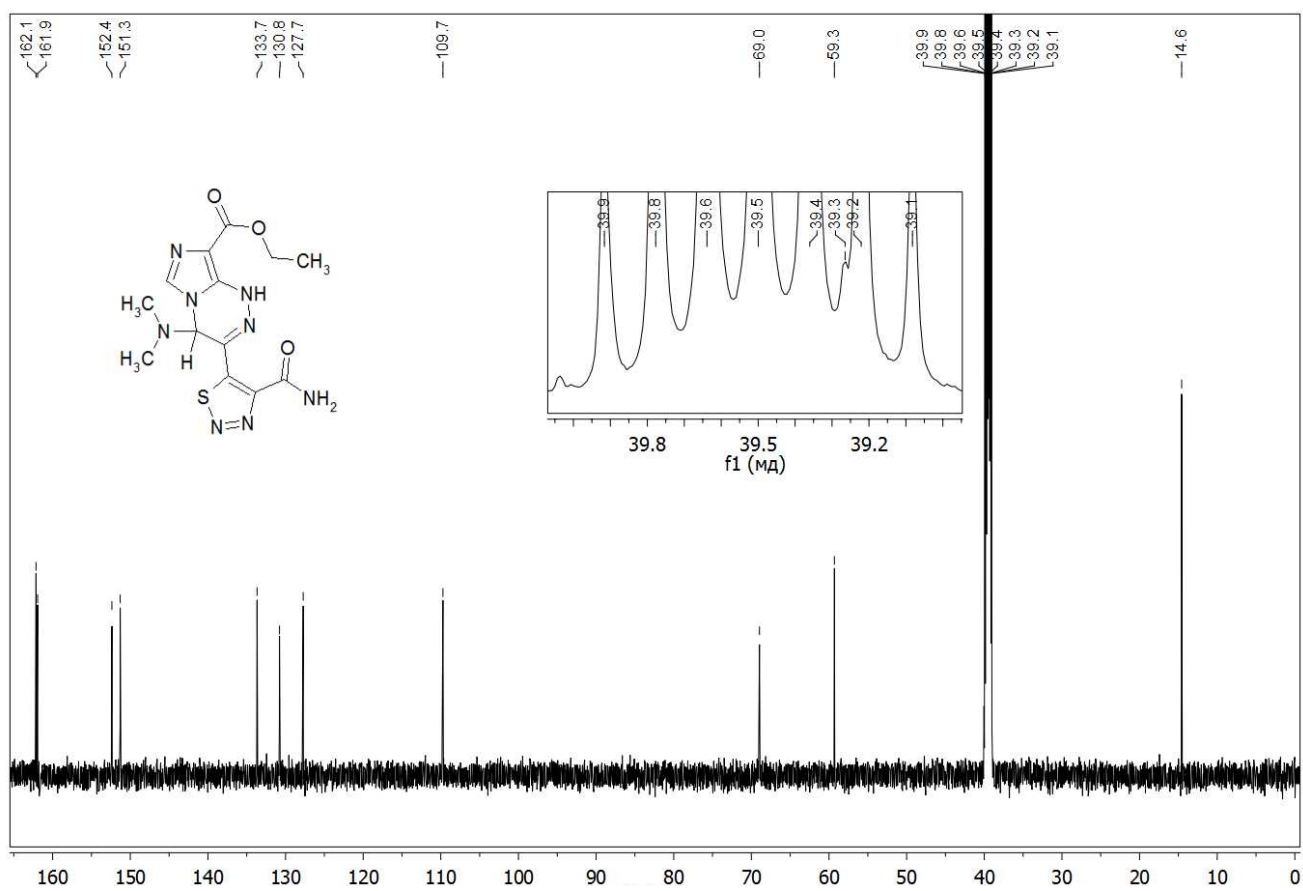

**Fig. S10.** <sup>13</sup>C NMR spectrum of ethyl 3-(4-carbamoyl-1,2,3-thiadiazol-5-yl)-4-(*N,N*-dimethylamino)-1,4-dihydroimidazo[5,1-*c*][1,2,4]triazine-8-carboxylate (**6d**)

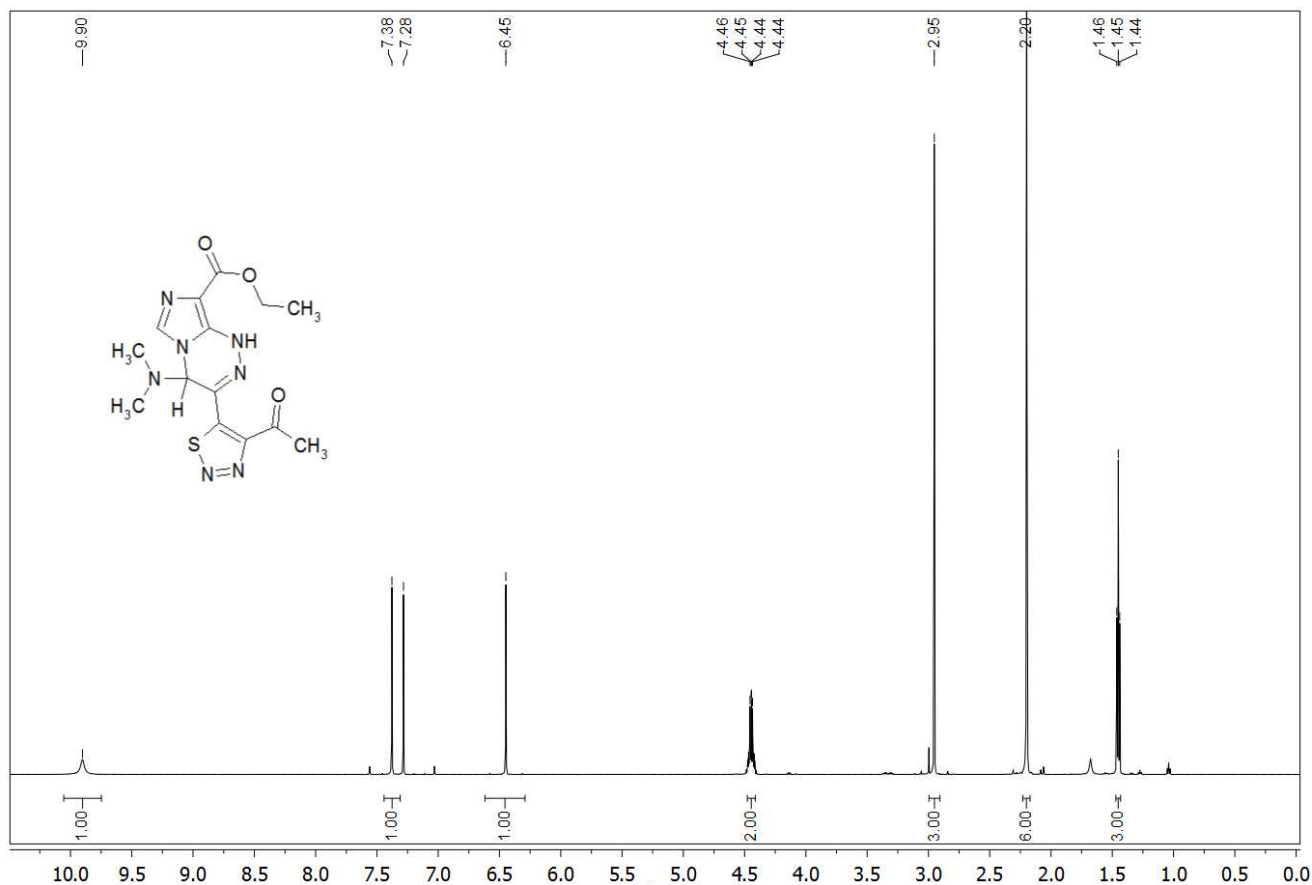

**Fig. S11.** <sup>1</sup>H NMR spectrum of ethyl 3-(4-acetyl-1,2,3-thiadiazol-5-yl)-4-(*N,N*-dimethylamino)-1,4-dihydroimidazo[5,1-*c*][1,2,4]triazine-8-carboxylate (**6e**)

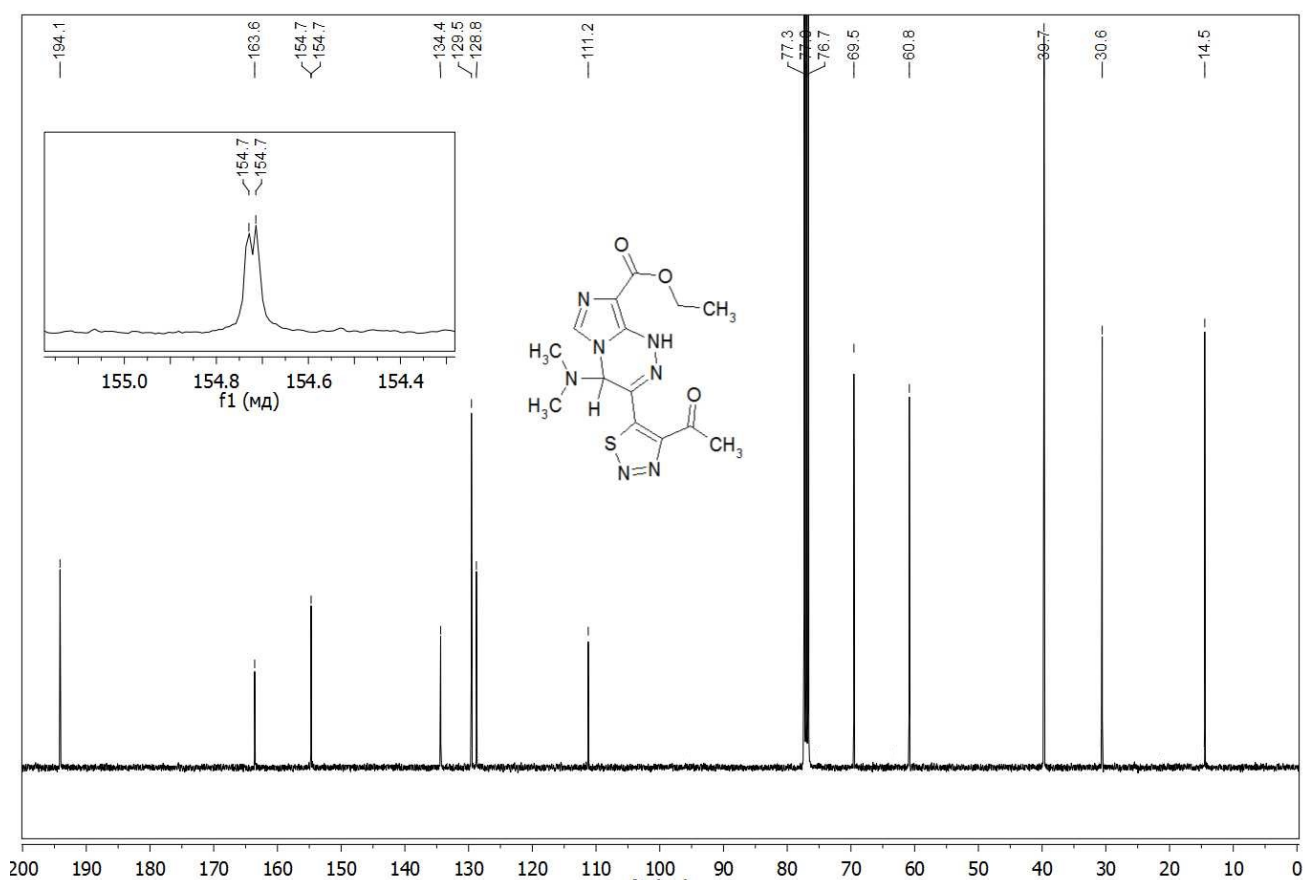

**Fig. S12.** <sup>13</sup>C NMR spectrum of ethyl 3-(4-acetyl-1,2,3-thiadiazol-5-yl)-4-(*N,N*-dimethylamino)-1,4-dihydroimidazo[5,1-*c*][1,2,4]triazine-8-carboxylate (**6e**)

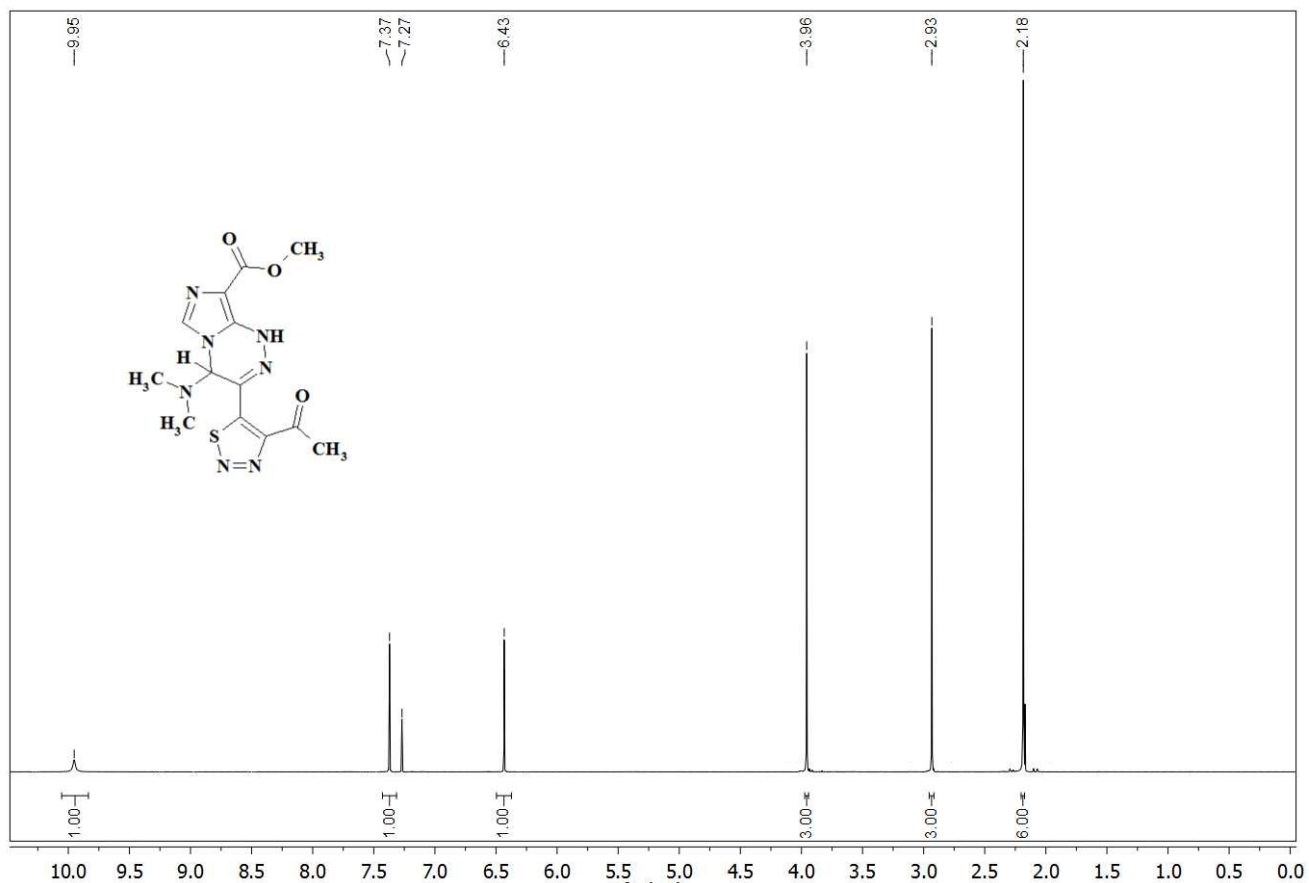

**Fig. S13.** <sup>1</sup>H NMR spectrum of methyl 3-(4-acetyl-1,2,3-thiadiazol-5-yl)-4-(*N,N*-dimethylamino)-1,4-dihydroimidazo[5,1-*c*][1,2,4]triazine-8-carboxylate (**6f**)

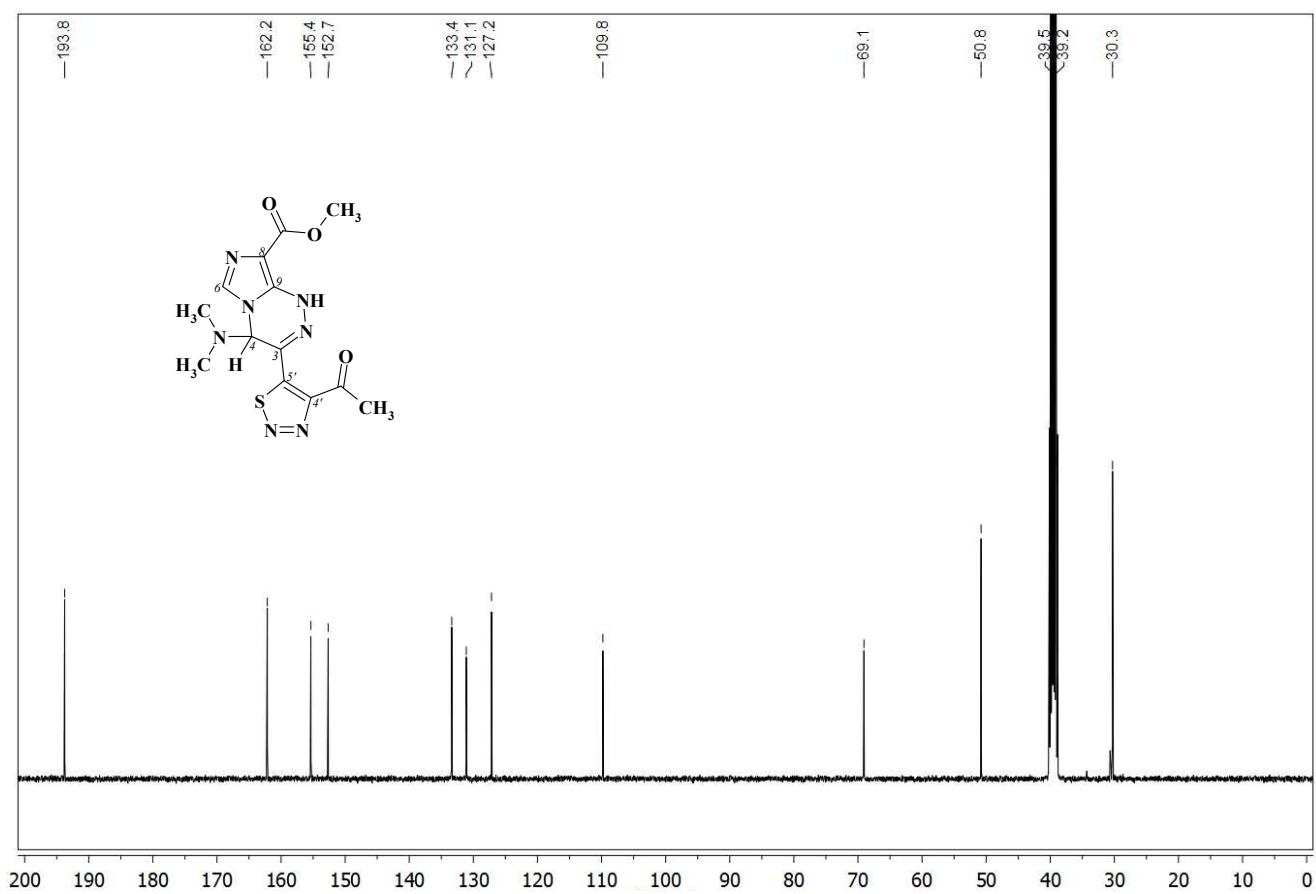

**Fig. S14.** <sup>13</sup>C NMR spectrum of methyl 3-(4-acetyl-1,2,3-thiadiazol-5-yl)-4-(*N,N*-dimethylamino)-1,4-dihydroimidazo[5,1-*c*][1,2,4]triazine-8-carboxylate (**6f**)

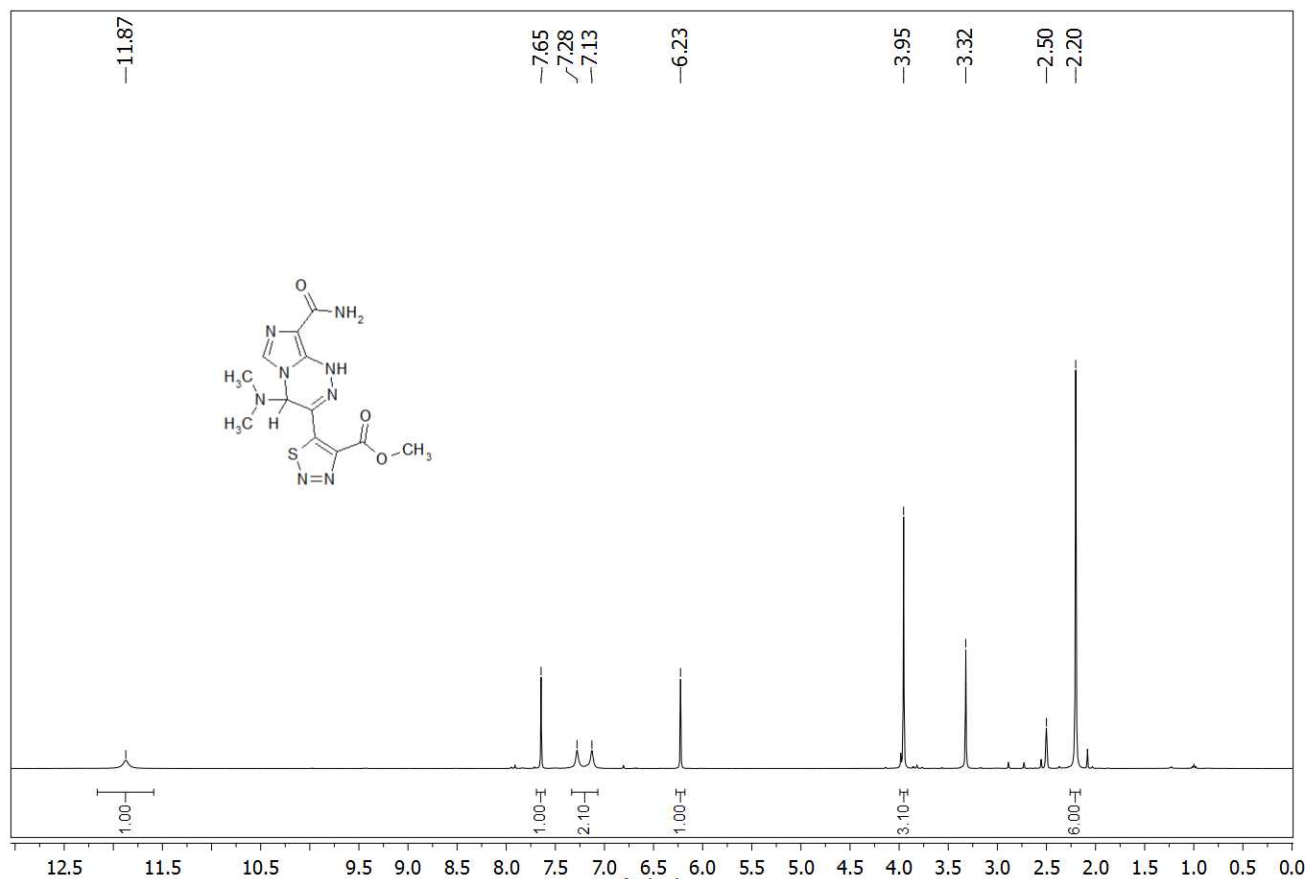

**Fig. S15.** <sup>1</sup>H NMR spectrum of 4-(*N,N*-dimethylamino)-3-[4-(methoxycarbonyl)-1,2,3-thiadiazol-5-yl]-1,4-dihydroimidazo[5,1-*c*][1,2,4]triazine-8-carboxamide (**6h**)

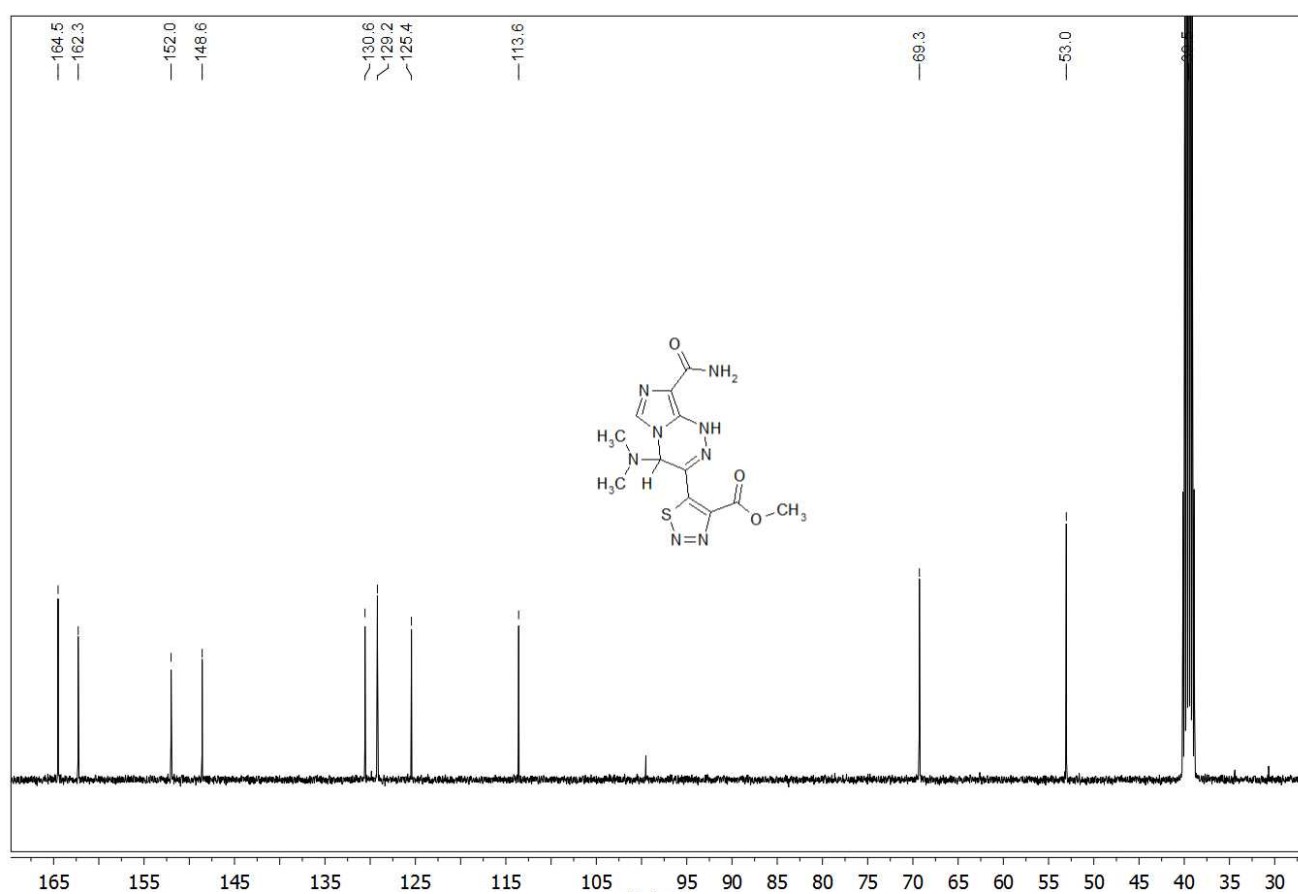

**Fig. S16.** <sup>13</sup>C NMR spectrum of 4-(*N,N*-dimethylamino)-3-[4-(methoxycarbonyl)-1,2,3-thiadiazol-5-yl]-1,4-dihydroimidazo[5,1-*c*][1,2,4]triazine-8-carboxamide (**6h**)



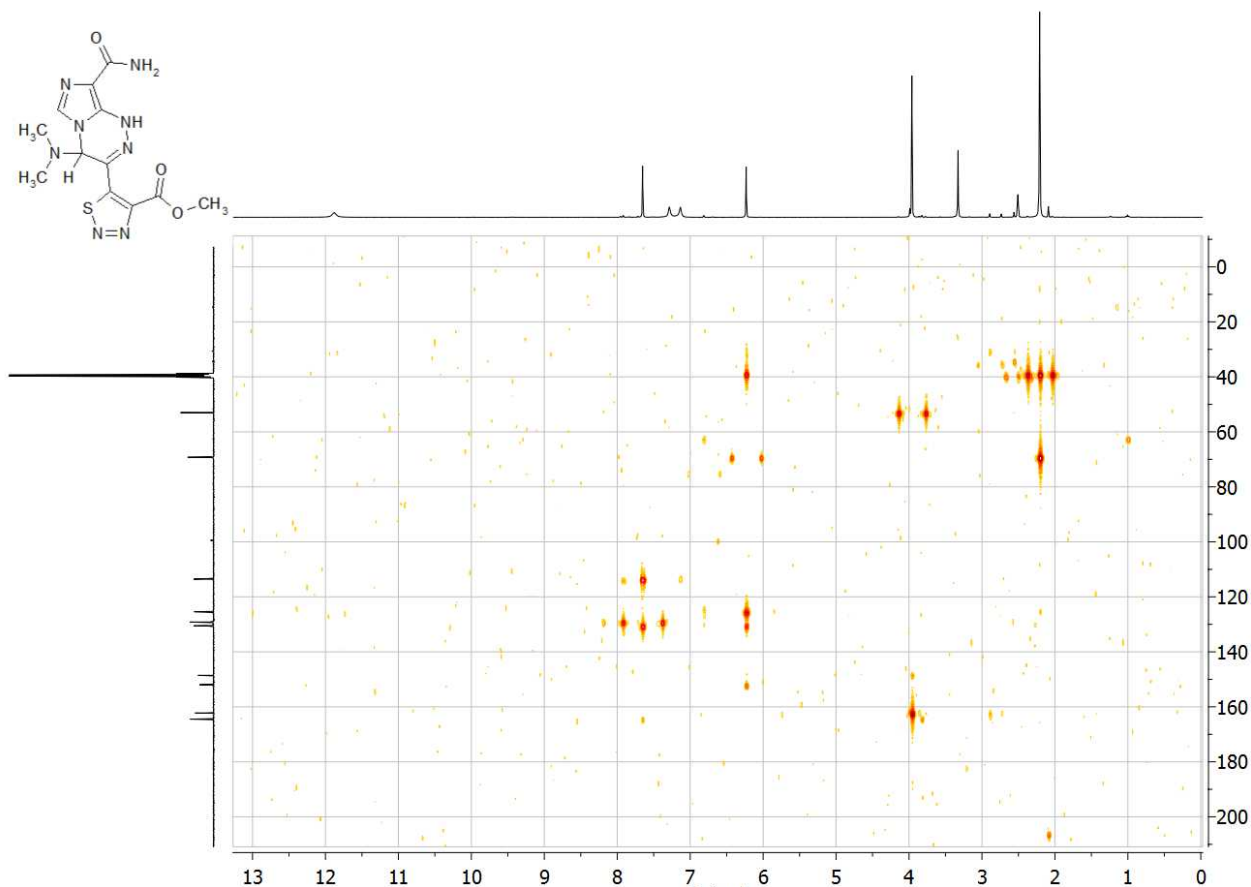

**Fig. S17.** HMBC spectrum of 4-(*N,N*-dimethylamino)-3-[4-(methoxycarbonyl)-1,2,3-thiadiazol-5-yl]-1,4-dihydroimidazo[5,1-*c*][1,2,4]triazine-8-carboxamide (**6h**)

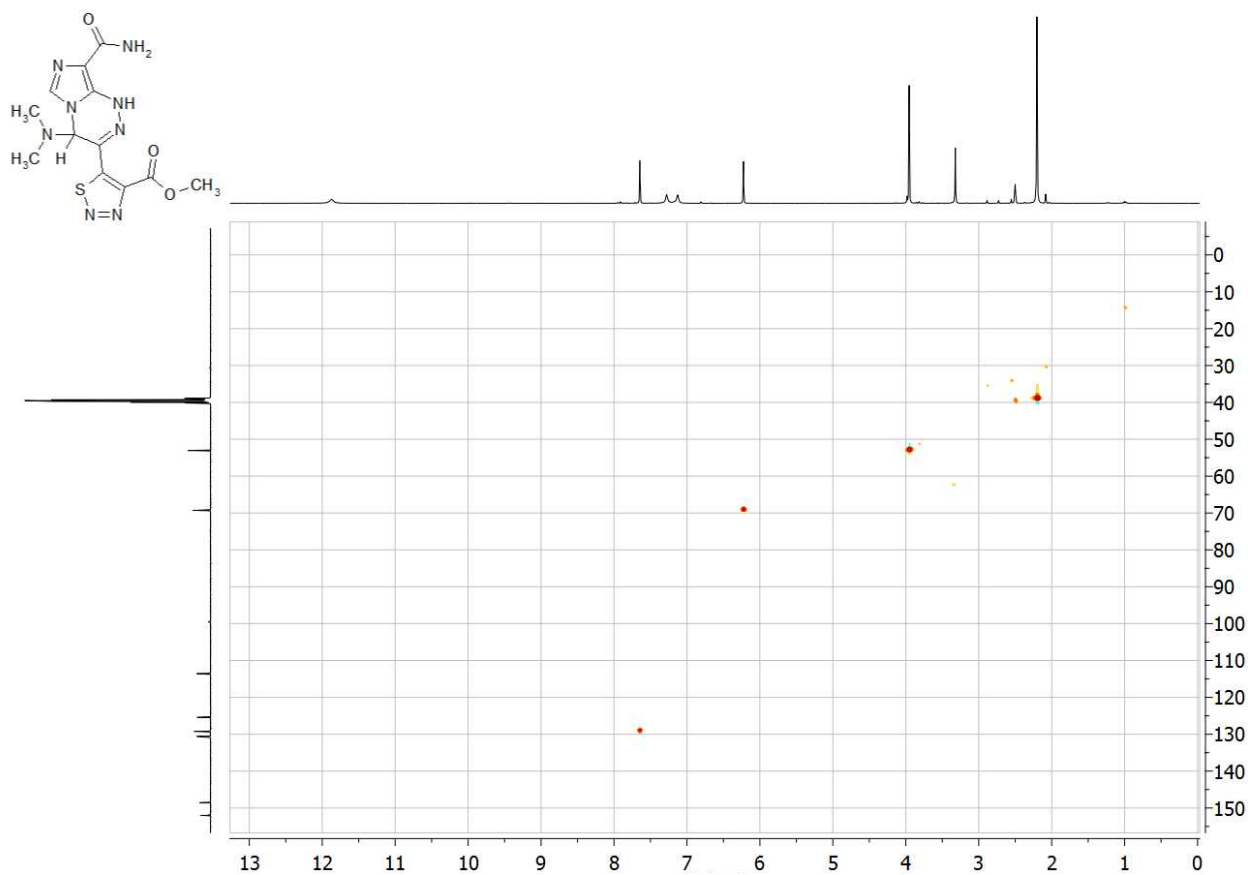

**Fig. S18.** HSQC spectrum of 4-(*N,N*-dimethylamino)-3-[4-(methoxycarbonyl)-1,2,3-thiadiazol-5-yl]-1,4-dihydroimidazo[5,1-*c*][1,2,4]triazine-8-carboxamide (**6h**)

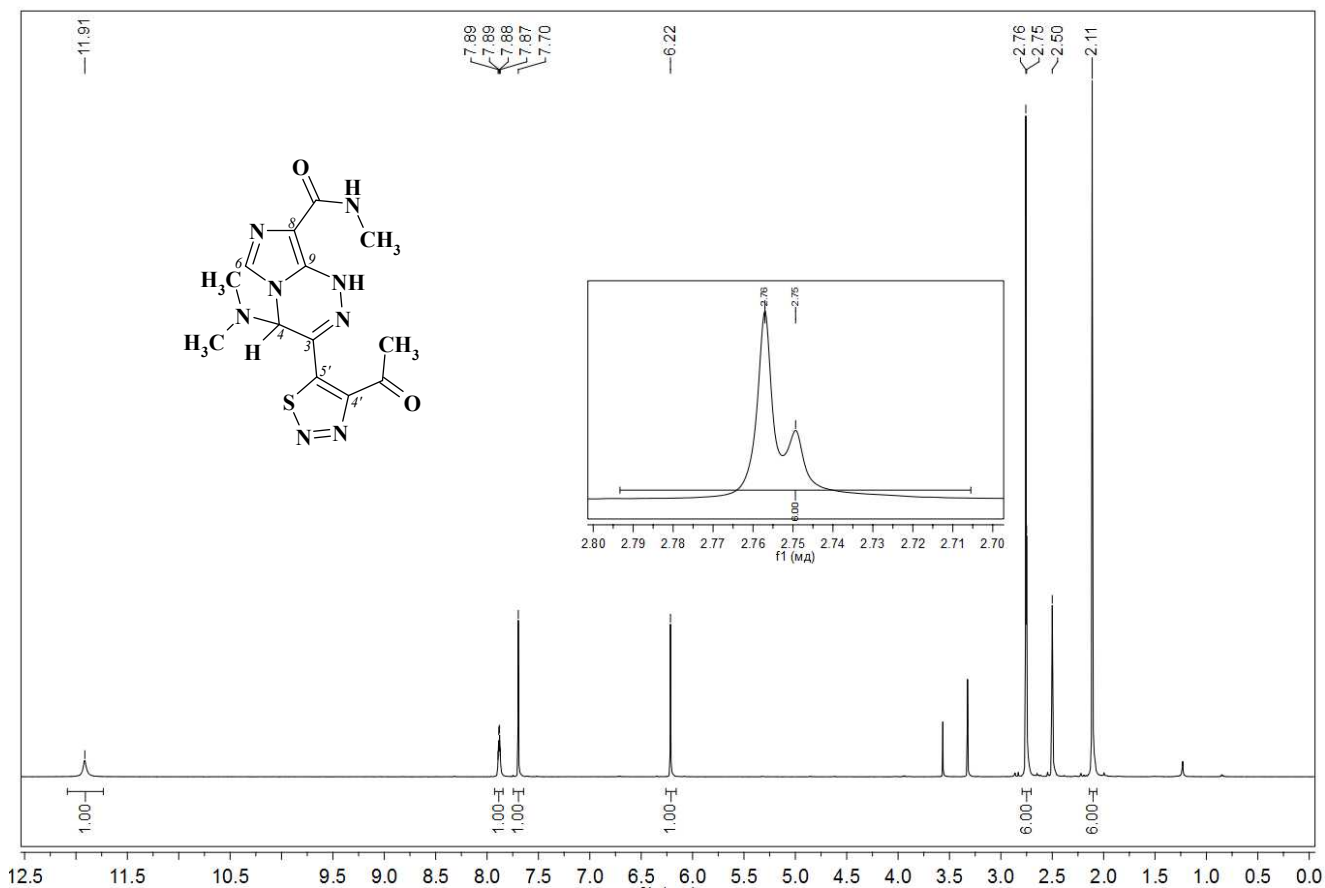

**Fig. S19.** <sup>1</sup>H NMR spectrum of 3-(4-acetyl-1,2,3-thiadiazol-5-yl)-4-(*N,N*-dimethylamino)-1,4-dihydroimidazo[5,1-*c*][1,2,4]triazine-8-*N*-methylcarboxamide (**6i**)

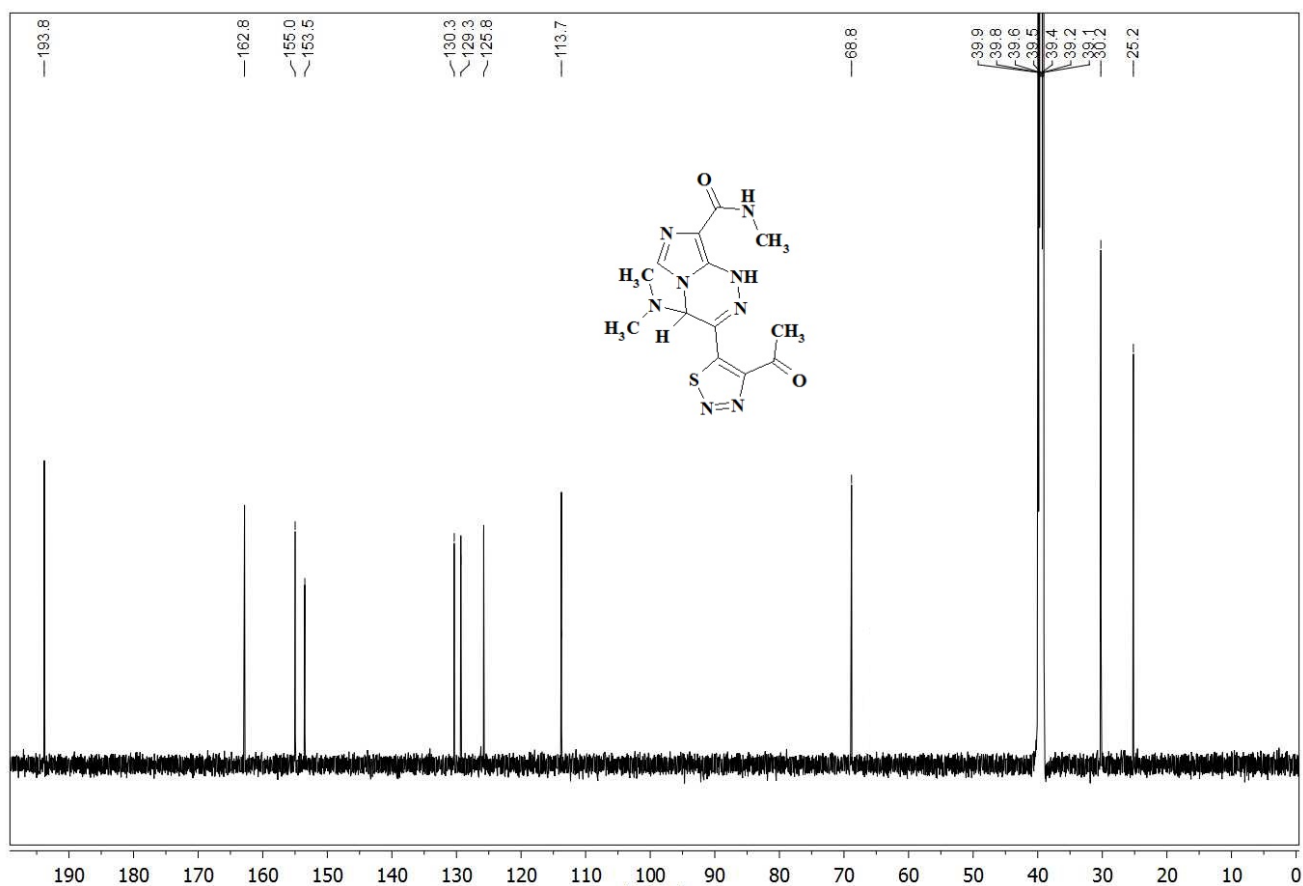

**Fig. S20.** <sup>13</sup>C NMR spectrum of 3-(4-acetyl-1,2,3-thiadiazol-5-yl)-4-(*N,N*-dimethylamino)-1,4-dihydroimidazo[5,1-*c*][1,2,4]triazine-8-*N*-methylcarboxamide (**6i**)

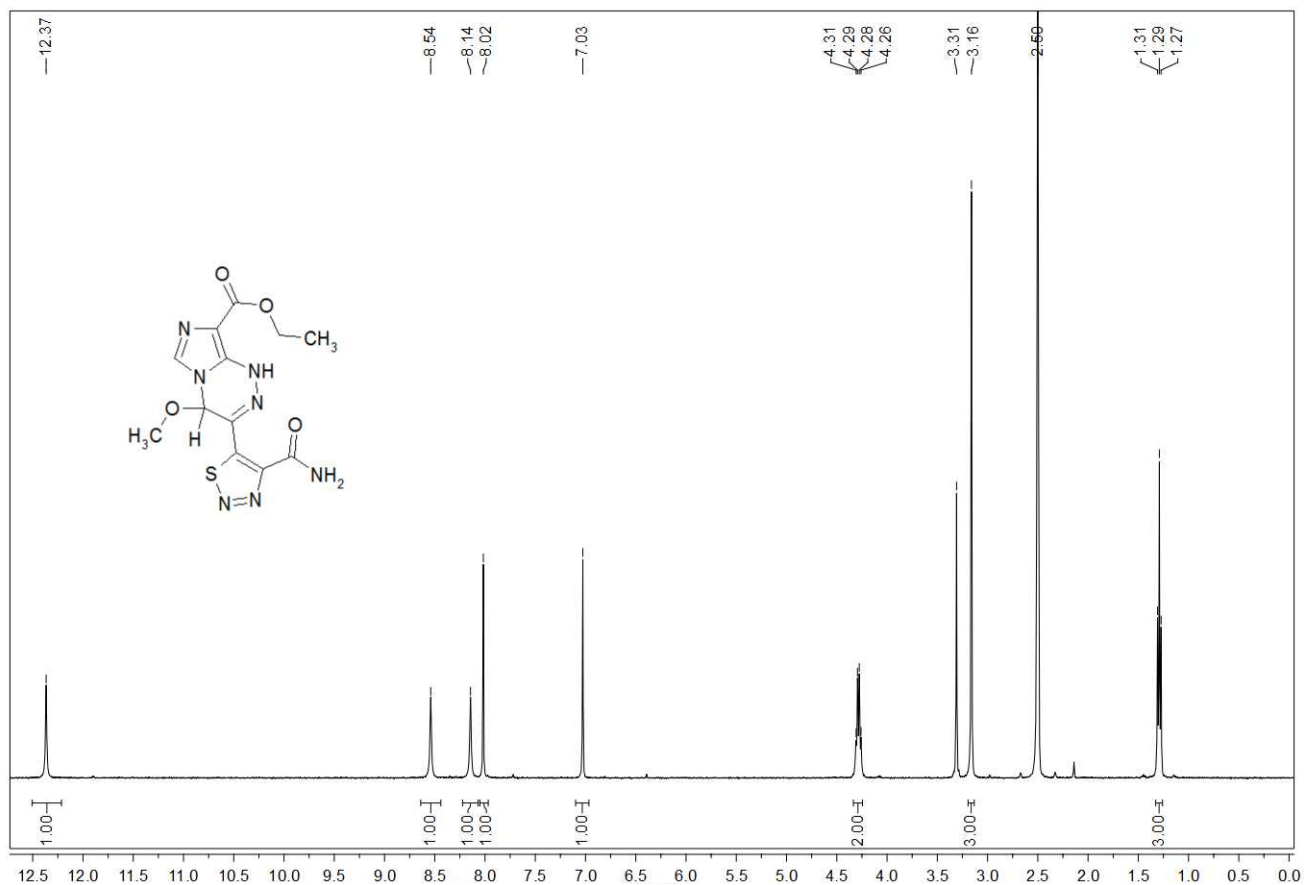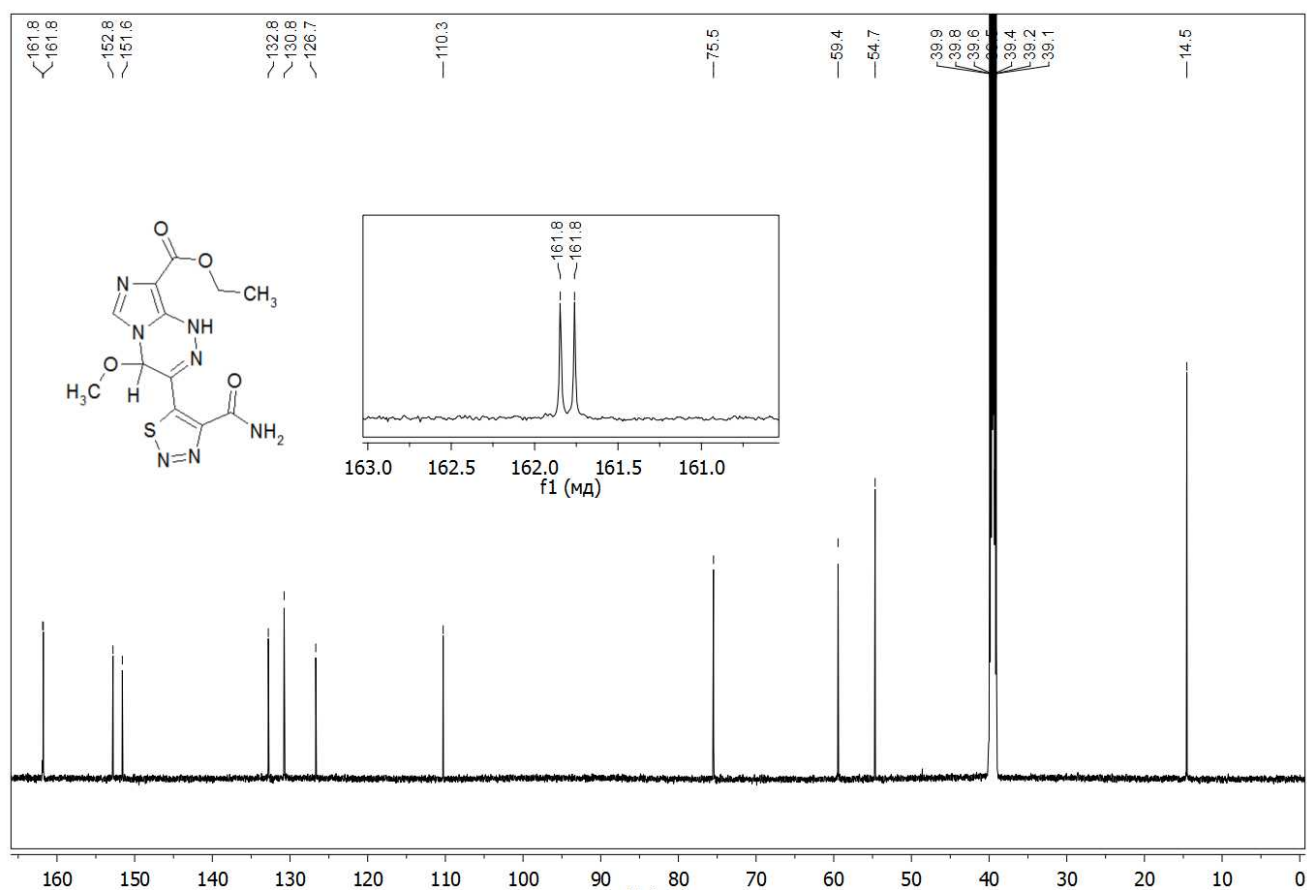

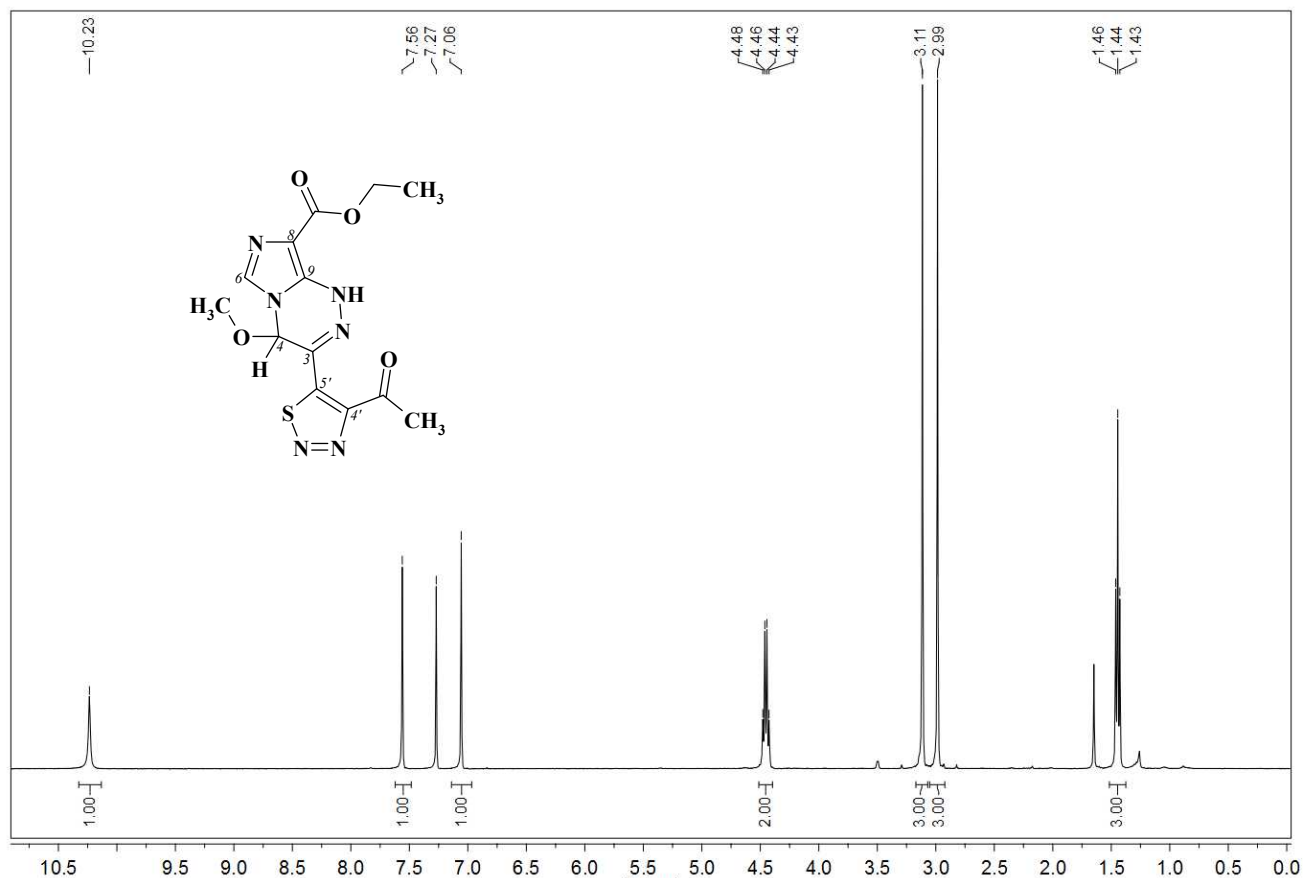

**Fig. S23.** <sup>1</sup>H NMR spectrum of ethyl 3-(4-acetyl-1,2,3-thiadiazol-5-yl)-4-methoxy-1,4-dihydroimidazo[5,1-c][1,2,4]triazine-8-carboxylate (7e)

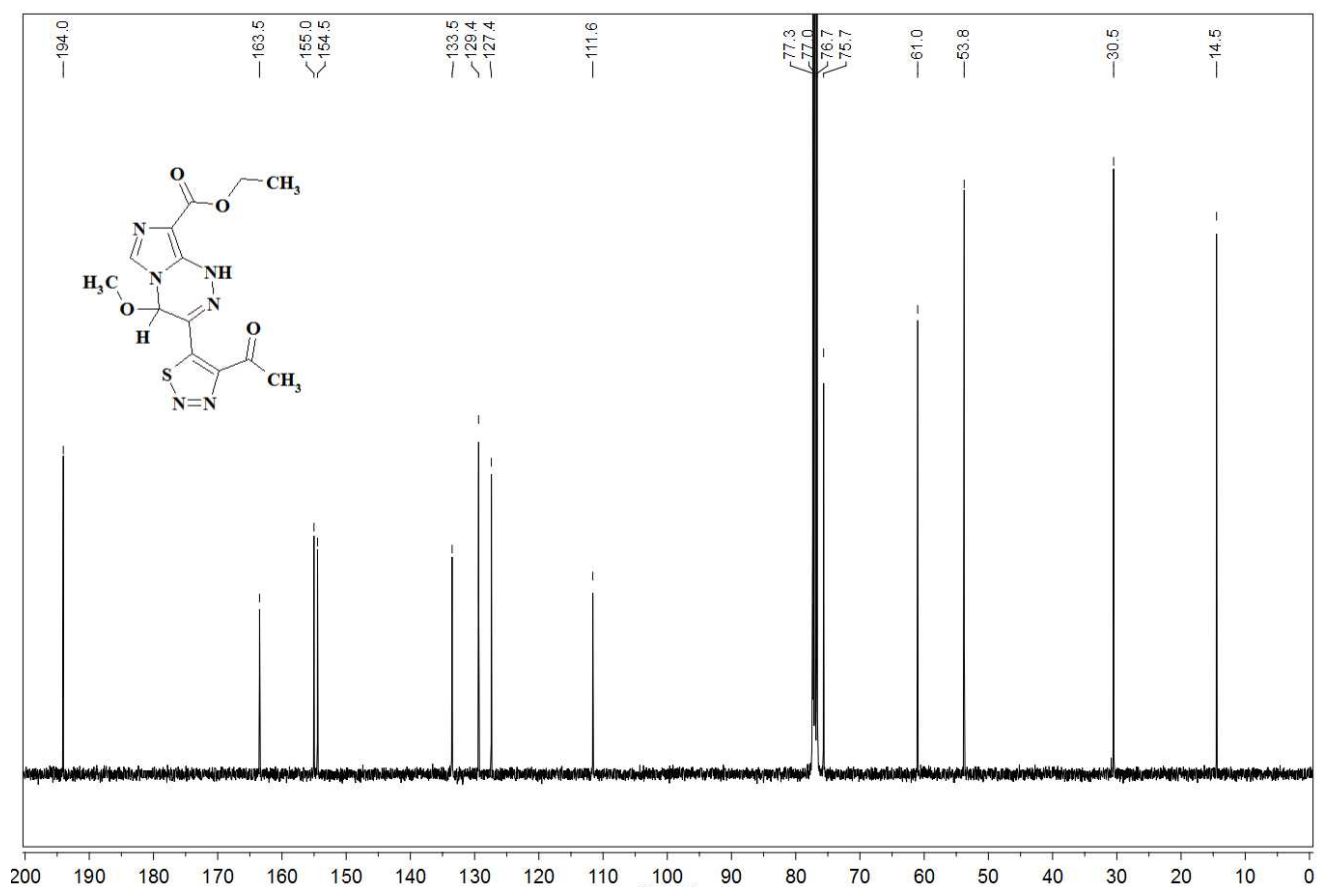

**Fig. S24.** <sup>13</sup>C NMR spectrum of ethyl 3-(4-acetyl-1,2,3-thiadiazol-5-yl)-4-methoxy-1,4-dihydroimidazo[5,1-c][1,2,4]triazine-8-carboxylate (7e)

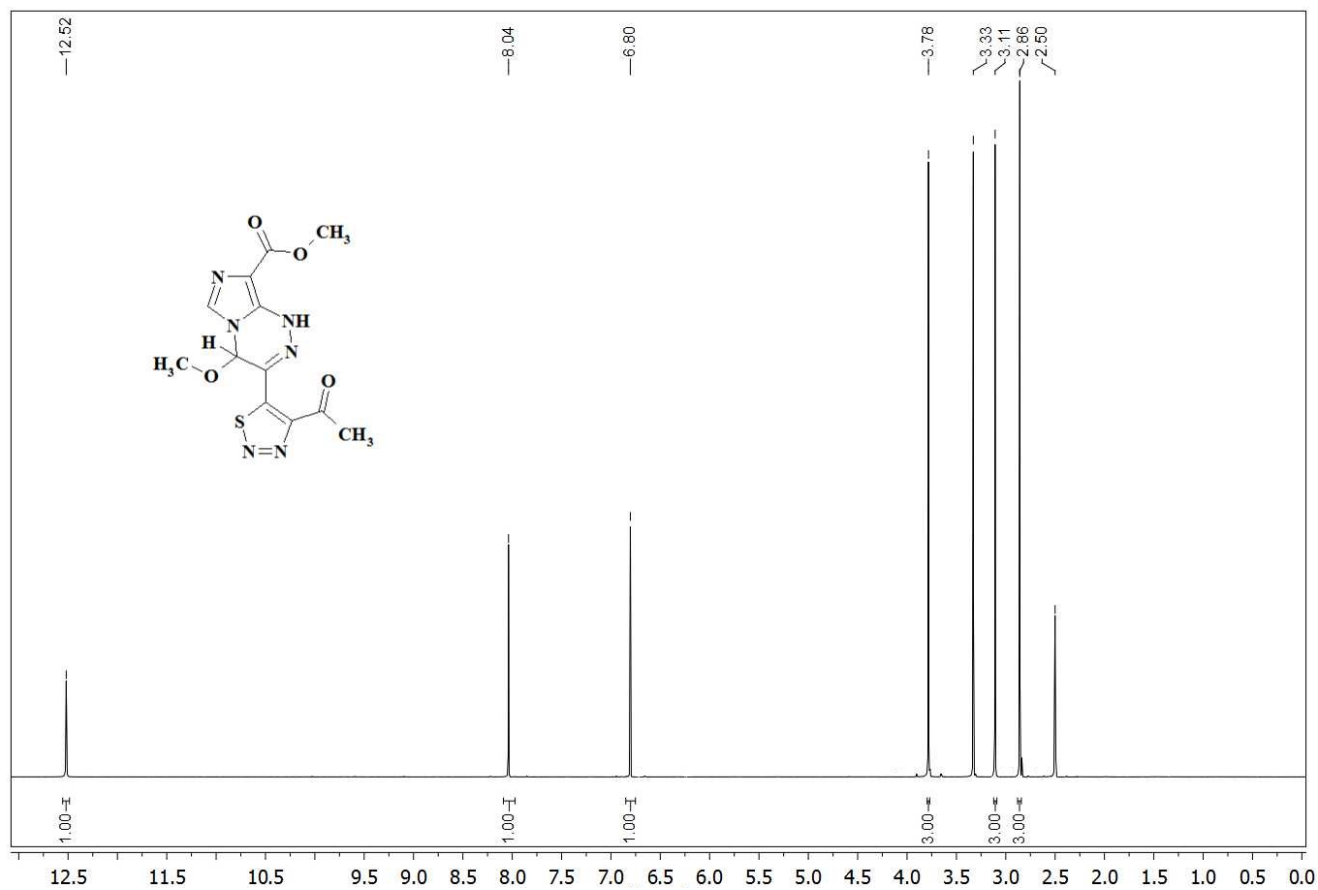

**Fig. S25.** <sup>1</sup>H NMR spectrum of methyl 3-(4-acetyl-1,2,3-thiadiazol-5-yl)-4-methoxy-1,4-dihydroimidazo[5,1-c][1,2,4]triazine-8-carboxylate (**7f**)

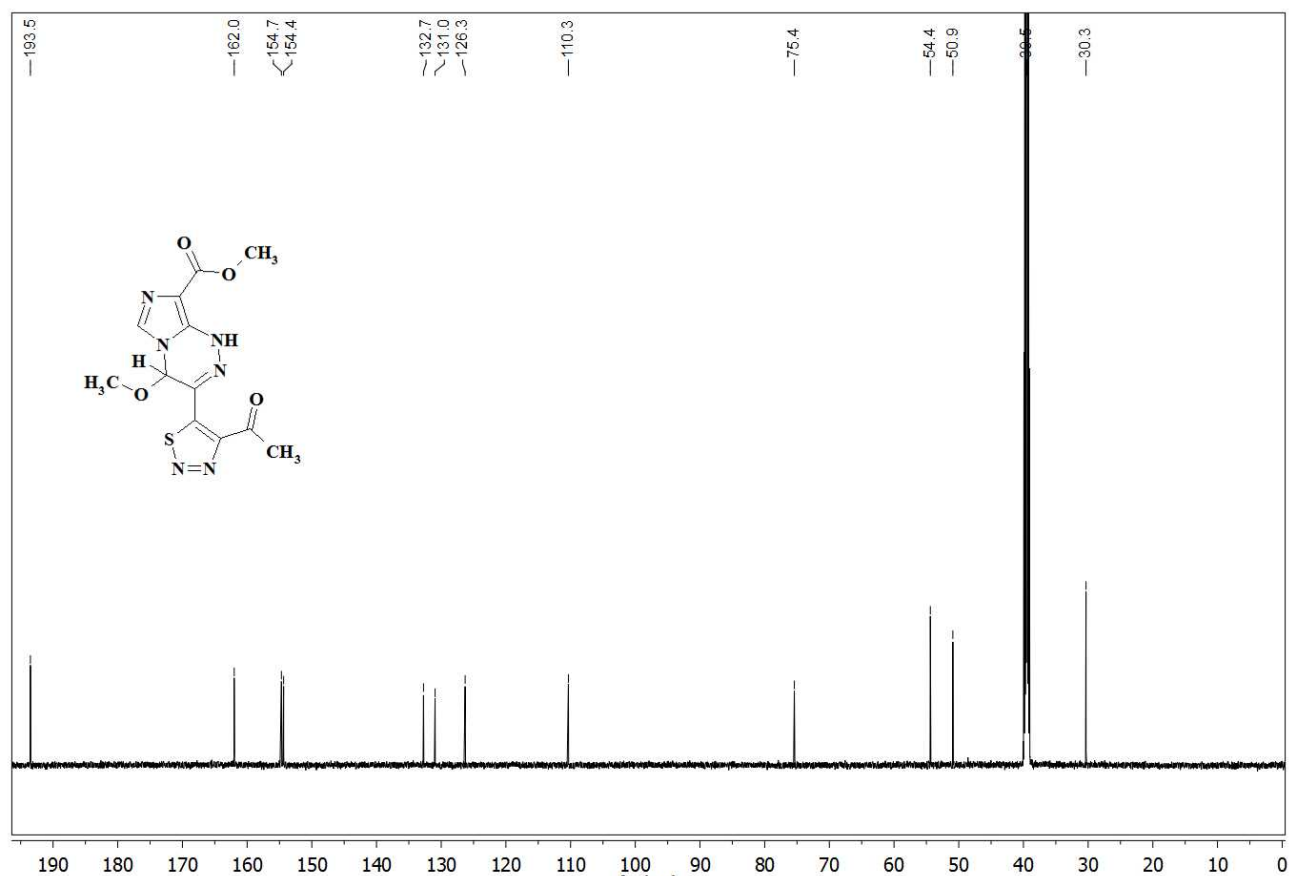

**Fig. S26.** <sup>13</sup>C NMR spectrum of methyl 3-(4-acetyl-1,2,3-thiadiazol-5-yl)-4-methoxy-1,4-dihydroimidazo[5,1-c][1,2,4]triazine-8-carboxylate (**7f**)

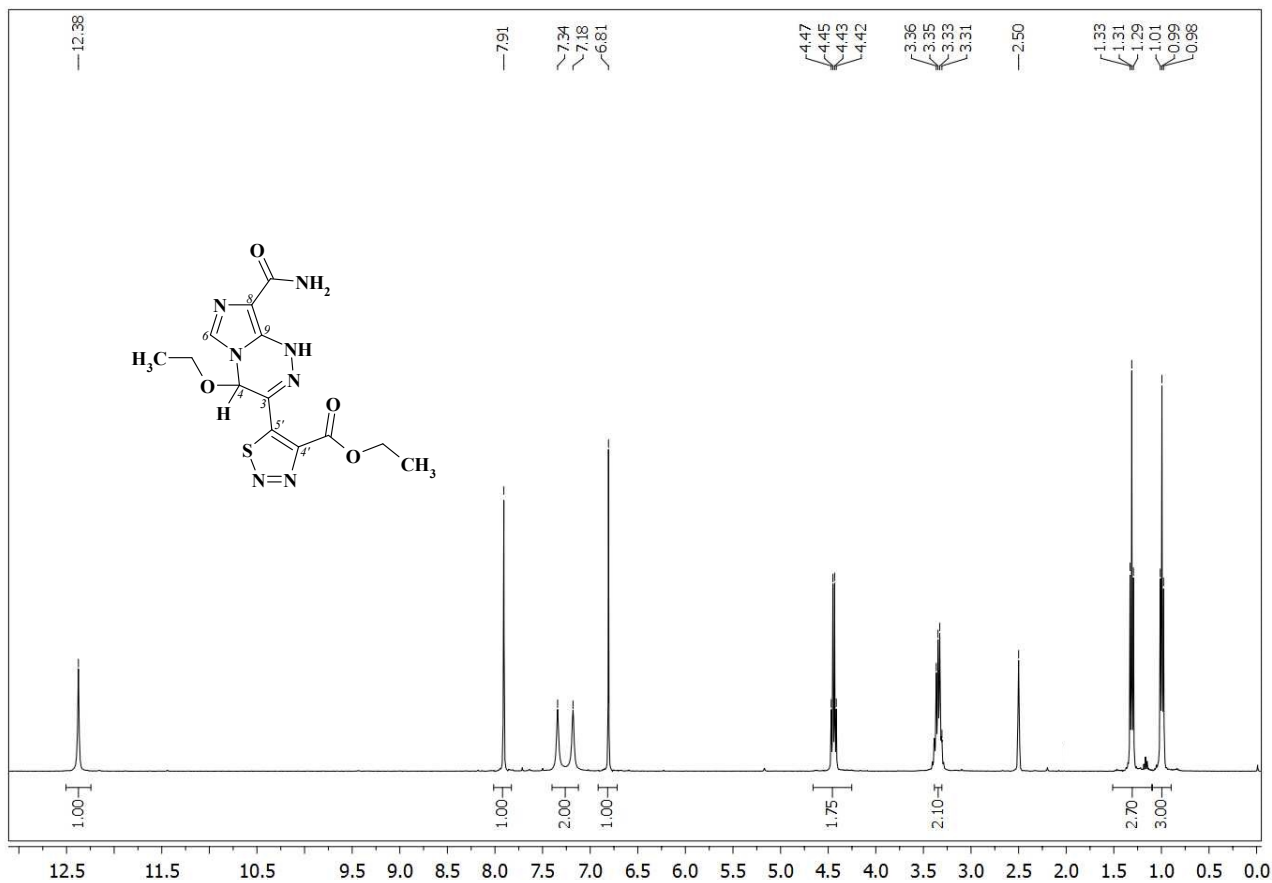

**Fig. S27.**  $^1\text{H}$  NMR spectrum of 4-ethoxy-3-[4-(ethoxycarbonyl)-1,2,3-thiadiazol-5-yl]-1,4-dihydroimidazo[5,1-c][1,2,4]-triazine-8-carboxamide (**7g**)

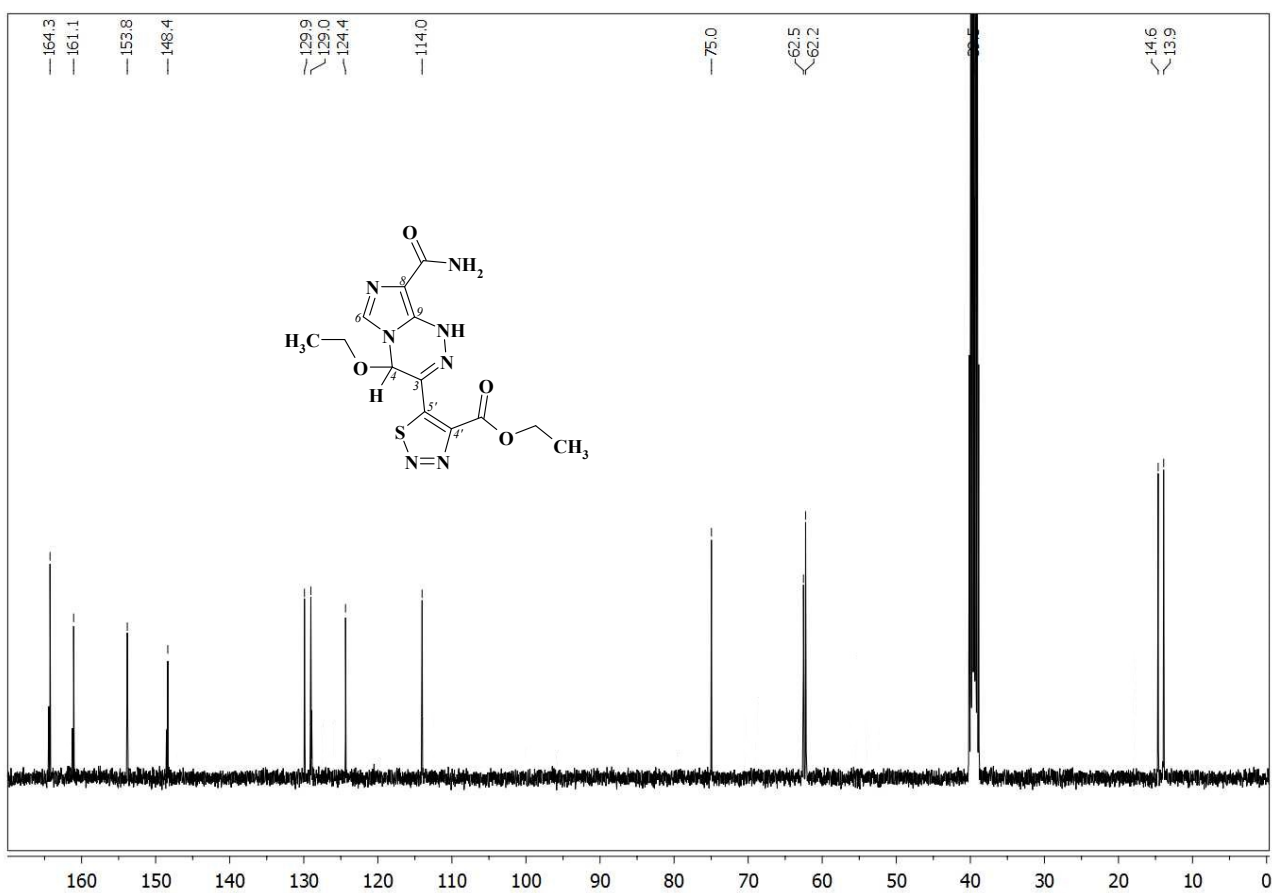

**Fig. S28.**  $^{13}\text{C}$  NMR spectrum of 4-ethoxy-3-[4-(ethoxycarbonyl)-1,2,3-thiadiazol-5-yl]-1,4-dihydroimidazo[5,1-c][1,2,4]-triazine-8-carboxamide (**7g**)

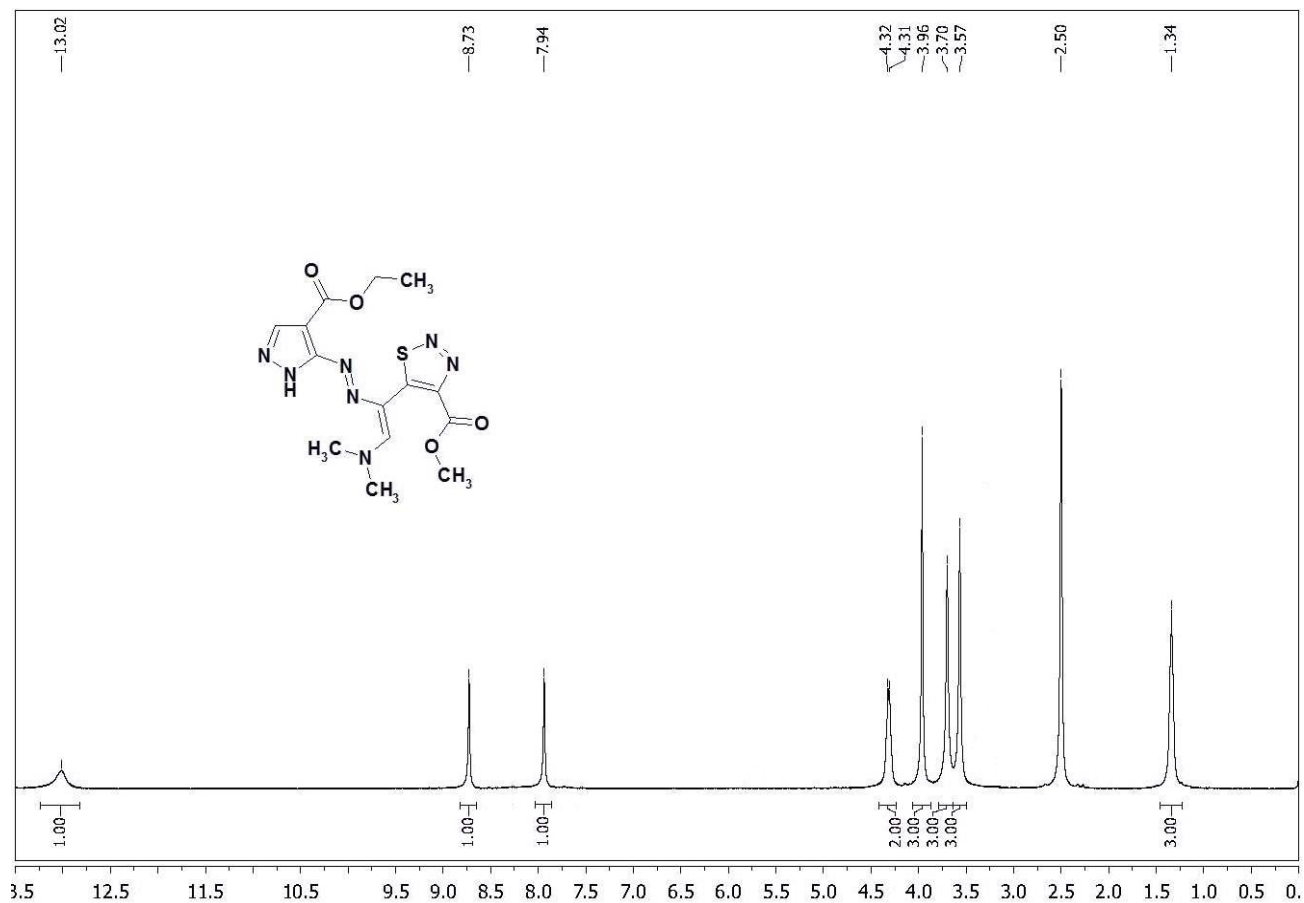

**Fig. S29.**  $^1\text{H}$  NMR spectrum of 4-(*N,N*-dimethylamino)-3-(4-methoxycarbonylthiadiazol-5-yl)-1-(4-ethoxycarbonylpyrazol-5-yl)-1,2-diazabuta-1,3-diene (**9**)

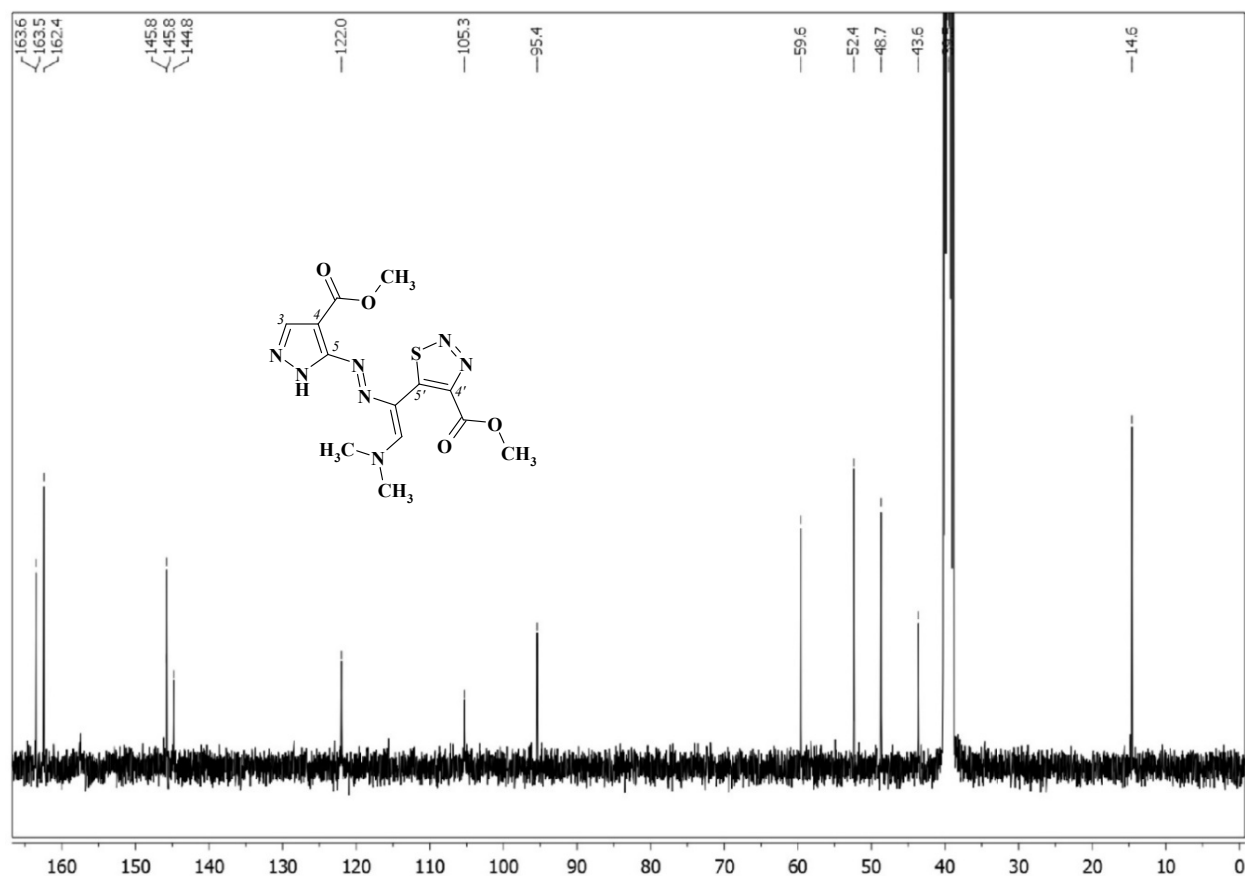

**Fig. S30.**  $^{13}\text{C}$  NMR spectrum of 4-(*N,N*-dimethylamino)-3-(4-methoxycarbonylthiadiazol-5-yl)-1-(4-ethoxycarbonylpyrazol-5-yl)-1,2-diazabuta-1,3-diene (**9**)

## 5. References

1. İ. Sıdır, T. Sarı, Y. G. Sıdır and H. Berber, *J. Mol. Liquids.*, 2022, **346**, 117075.
2. E. Lippert, *Z. Elektrochem., Ber. Bunsengesel. Phys. Chem.*, 1957, **61**, 962.
3. J. P. Cerdón-Carrasco, D. Jacquemin, C. Laurence, A. Planchat, C. Reichardt and K. Sraïdi, *J. Phys. Org. Chem.*, 2014, **27** (6), 512.
4. C. Reichardt, *Angew. Chemie. Int. Ed.*, 1979, **18** (2), 98.
5. Q. Wang, L. Cai, F. Gao, Q. Zhou, F. Zhan and Q. Wang, *J. Mol. Struct.*, 2010, **977** (1–3), 274.
6. O. V. Dolomanov, L. J. Bourhis, R. J. Gildea, J. A. K. Howard and H. Puschmann, *J. Appl. Cryst.*, 2009, **42**, 339.
7. SHELXS, G. M. Sheldrick, *Acta Cryst.*, 2008, **A64**, 112.
